# Supplementary material for: Characterising a Microsatellite for DRB Typing in Aotus vociferans and Aotus nancymaae (Platyrrhini)
Source: PubMed Central journal article supplement (PMC4018467; doi:10.1371/journal.pone.0096973), 2014-05-12
Supplement: pone.0096973.s001.pdf [file pone.0096973.s001.pdf]

| Sequence                                                                                                                                                                                                                                                                                                                                                                                                                                                                                                                                                                                                                                                                                                                                                                                                                                                                                                                                                                                                                                                                                                                              | Remarks                                                                                                                                                                                                                                                                                                                                                                                                                                                                                                                                                                                                                                                                                                                                                                                                                                                                                                                                                                                                                                                                                                                                                                                                                                                                                                                                                                                                                                                                                                                                                                                                                                                                                                                                                                                                                                                                                                                                                                                                                                                                                                                                                                                                                                                                                                                                                                                                                                                                                                                                                                                                                                                                                                                                                                                                                                                                                                                                                                                                                                                                                                                                                                                                                                                                                                                                                                                                                                                                                                                                                                                                                                                                                                                                                                                                                                                                                                                                                                                                                                                                                                                                                                                                                                                                                                                                                                                                                                                                                                                                                                                                                                                                                                                                                                                                                                                                                                                                                                                                                                                                                                                                                                          | Accession Number Genbank                                                                                                                                                                                                                                                                                                                                                                                                                                                                                                                                                                                                                                                                                                                                          |
|---------------------------------------------------------------------------------------------------------------------------------------------------------------------------------------------------------------------------------------------------------------------------------------------------------------------------------------------------------------------------------------------------------------------------------------------------------------------------------------------------------------------------------------------------------------------------------------------------------------------------------------------------------------------------------------------------------------------------------------------------------------------------------------------------------------------------------------------------------------------------------------------------------------------------------------------------------------------------------------------------------------------------------------------------------------------------------------------------------------------------------------|----------------------------------------------------------------------------------------------------------------------------------------------------------------------------------------------------------------------------------------------------------------------------------------------------------------------------------------------------------------------------------------------------------------------------------------------------------------------------------------------------------------------------------------------------------------------------------------------------------------------------------------------------------------------------------------------------------------------------------------------------------------------------------------------------------------------------------------------------------------------------------------------------------------------------------------------------------------------------------------------------------------------------------------------------------------------------------------------------------------------------------------------------------------------------------------------------------------------------------------------------------------------------------------------------------------------------------------------------------------------------------------------------------------------------------------------------------------------------------------------------------------------------------------------------------------------------------------------------------------------------------------------------------------------------------------------------------------------------------------------------------------------------------------------------------------------------------------------------------------------------------------------------------------------------------------------------------------------------------------------------------------------------------------------------------------------------------------------------------------------------------------------------------------------------------------------------------------------------------------------------------------------------------------------------------------------------------------------------------------------------------------------------------------------------------------------------------------------------------------------------------------------------------------------------------------------------------------------------------------------------------------------------------------------------------------------------------------------------------------------------------------------------------------------------------------------------------------------------------------------------------------------------------------------------------------------------------------------------------------------------------------------------------------------------------------------------------------------------------------------------------------------------------------------------------------------------------------------------------------------------------------------------------------------------------------------------------------------------------------------------------------------------------------------------------------------------------------------------------------------------------------------------------------------------------------------------------------------------------------------------------------------------------------------------------------------------------------------------------------------------------------------------------------------------------------------------------------------------------------------------------------------------------------------------------------------------------------------------------------------------------------------------------------------------------------------------------------------------------------------------------------------------------------------------------------------------------------------------------------------------------------------------------------------------------------------------------------------------------------------------------------------------------------------------------------------------------------------------------------------------------------------------------------------------------------------------------------------------------------------------------------------------------------------------------------------------------------------------------------------------------------------------------------------------------------------------------------------------------------------------------------------------------------------------------------------------------------------------------------------------------------------------------------------------------------------------------------------------------------------------------------------------------------------------------|-------------------------------------------------------------------------------------------------------------------------------------------------------------------------------------------------------------------------------------------------------------------------------------------------------------------------------------------------------------------------------------------------------------------------------------------------------------------------------------------------------------------------------------------------------------------------------------------------------------------------------------------------------------------------------------------------------------------------------------------------------------------|
| <b>Sequences of Aotus MHC-DRB (molecular phylogenetic analysis exon 2)</b>                                                                                                                                                                                                                                                                                                                                                                                                                                                                                                                                                                                                                                                                                                                                                                                                                                                                                                                                                                                                                                                            |                                                                                                                                                                                                                                                                                                                                                                                                                                                                                                                                                                                                                                                                                                                                                                                                                                                                                                                                                                                                                                                                                                                                                                                                                                                                                                                                                                                                                                                                                                                                                                                                                                                                                                                                                                                                                                                                                                                                                                                                                                                                                                                                                                                                                                                                                                                                                                                                                                                                                                                                                                                                                                                                                                                                                                                                                                                                                                                                                                                                                                                                                                                                                                                                                                                                                                                                                                                                                                                                                                                                                                                                                                                                                                                                                                                                                                                                                                                                                                                                                                                                                                                                                                                                                                                                                                                                                                                                                                                                                                                                                                                                                                                                                                                                                                                                                                                                                                                                                                                                                                                                                                                                                                                  |                                                                                                                                                                                                                                                                                                                                                                                                                                                                                                                                                                                                                                                                                                                                                                   |
| <p>Aoaz-DRB*W3801<br/>Aoaz-DRB3*0601<br/>Aona-DRB*W1301<br/>Aona-DRB*W1305<br/>Aona-DRB*W1306<br/>Aona-DRB*W1309<br/>Aona-DRB*W1312<br/>Aona-DRB*W1801<br/>Aona-DRB*W1802<br/>Aona-DRB*W2901<br/>Aona-DRB*W2906<br/>Aona-DRB*W2907<br/>Aona-DRB*W3001<br/>Aona-DRB*W3801<br/>Aona-DRB*W4201<br/>Aona-DRB*W4401<br/>Aona-DRB*W4501<br/>Aona-DRB*W4701<br/>Aona-DRB*W4702<br/>Aona-DRB*W470404<br/>Aona-DRB1*0301<br/>Aona-DRB1*0302<br/>Aona-DRB1*0303<br/>Aona-DRB1*0305<br/>Aona-DRB1*0307<br/>Aona-DRB1*0313<br/>Aona-DRB1*0314<br/>Aona-DRB1*0319<br/>Aona-DRB1*0324<br/>Aona-DRB3*0601<br/>Aona-DRB3*0602<br/>Aona-DRB3*0603<br/>Aona-DRB3*0614<br/>Aoni-DRB*W1301<br/>Aoni-DRB*W1303<br/>Aoni-DRB*W2901<br/>Aoni-DRB*W2902<br/>Aoni-DRB*W3801<br/>Aoni-DRB*W4201<br/>Aoni-DRB*W4301<br/>Aoni-DRB*W4401<br/>Aoni-DRB1*0301<br/>Aoni-DRB1*0304<br/>Aoni-DRB1*0307<br/>Aoni-DRB1*W1801<br/>Aoni-DRB3*0601<br/>Aotr-DRB*W1801<br/>Aotr-DRB1*0301<br/>Aotr-DRB1*0303<br/>Aotr-DRB3*0602<br/>Aotr-DRB3*0603<br/>Aotr-DRB3*06<br/>Aoovo-DRB*W130101<br/>Aoovo-DRB*W1303<br/>Aoovo-DRB*W4301<br/>Aoovo-DRB*W4701<br/>Aoovo-DRB1*0301</p> | <p>Aotus azarai MHC class II antigen (Aoaz-DRB) gene Aoaz-DRB*W3801 allele<br/>Aotus azarai MHC class II antigen (Aoaz-DRB3) gene Aoaz-DRB3*0601 allele<br/>Aotus nancymaae MHC class II antigen beta chain (Aona-DRB) gene Aona-DRB*W1301 allele<br/>Aotus nancymaae isolate 20896_2 MHC class II antigen beta chain (DRB) mRNA DRB*W1305 allele<br/>Aotus nancymaae isolate 21100_1 MHC class II antigen beta chain (DRB) mRNA DRB*W1306 allele<br/>Aotus nancymaae isolate 22417-7 MHC class II antigen beta chain (DRB) mRNA DRB*W1309 allele<br/>Aotus nancymaae MHC class II antigen (DRB) mRNA DRB*W1312 allele<br/>Aotus nancymaae MHC class II antigen beta chain (Aona-DRB) gene Aona-DRB*W1801 allele<br/>Aotus nancymaae MHC-DRB (DRB*W) mRNA DRB*W1802 allele<br/>Aotus nancymaae MHC class II antigen beta chain (Aona-DRB) gene Aona-DRB*W2901 allele<br/>Aotus nancymaae MHC class II antigen (DRB) mRNA DRB*W2906 allele<br/>Aotus nancymaae isolate 20894_3 MHC class II antigen beta chain (DRB) mRNA DRB*W2907 allele<br/>Aotus nancymaae MHC class II antigen beta chain (Aona-DRB) gene Aona-DRB*W3001 allele<br/>Aotus nancymaae isolate 16606_7 MHC class II antigen beta chain (DRB) mRNA DRB*W3801 allele<br/>Aotus nancymaae isolate 20337_3 MHC class II antigen beta chain (DRB) mRNA DRB*W4201 allele<br/>Aotus nancymaae isolate 20559_2 MHC class II antigen beta chain (DRB) mRNA DRB*W4401 allele<br/>Aotus nancymaae isolate 20249_12 MHC class II antigen beta chain (DRB) mRNA DRB*W4501 allele<br/>Aotus nancymaae isolate 20465_3 MHC class II antigen beta chain (DRB) mRNA DRB*W4701 allele<br/>Aotus nancymaae isolate 22822_13 MHC class II antigen beta chain (DRB) mRNA DRB*W4702 allele<br/>Aotus nancymaae MHC class II antigen (DRB) mRNA DRB*W470404 allele<br/>Aotus nancymaae MHC class II antigen beta chain (Aona-DRB1) gene Aona-DRB1*0301 allele<br/>Aotus nancymaae MHC class II antigen beta chain (Aona-DRB1) gene Aona-DRB1*0302 allele<br/>Aotus nancymaae MHC class II antigen beta chain (Aona-DRB1) gene Aona-DRB1*0303 allele<br/>Aotus nancymaae MHC class II antigen beta chain (Aona-DRB1) gene Aona-DRB1*0305 allele<br/>Aotus nancymaae MHC class II antigen beta chain (Aona-DRB1) gene Aona-DRB1*0307 allele<br/>Aotus nancymaae MHC class II antigen beta chain (Aona-DRB1) gene Aona-DRB1*0313 allele<br/>Aotus nancymaae MHC class II antigen beta chain (Aona-DRB1) gene Aona-DRB1*0314 allele<br/>Aotus nancymaae isolate 20719_2 MHC class II antigen beta chain (DRB1) mRNA DRB1*0319 allele<br/>Aotus nancymaae isolate 21955_10 MHC class II antigen beta chain (DRB1) mRNA DRB1*0324 allele<br/>Aotus nancymaae MHC class II antigen beta chain (Aona-DRB3) gene Aona-DRB3*0601 allele<br/>Aotus nancymaae MHC class II antigen beta chain (Aona-DRB3) gene Aona-DRB3*0602 allele<br/>Aotus nancymaae MHC class II antigen beta chain (Aona-DRB3) gene Aona-DRB3*0603 allele<br/>Aotus nancymaae isolate 20444_7 MHC class II antigen beta chain (DRB3) mRNA DRB3*0614 allele<br/>Aotus nigriceps isolate 21921_5 MHC class II antigen beta chain (DRB) mRNA DRB*W1301 allele<br/>Aotus nigriceps MHC class II antigen (DRB) mRNA DRB*W1303 allele<br/>Aotus nigriceps isolate 20596_8 MHC class II antigen beta chain (DRB) mRNA DRB*W2901 allele<br/>Aotus nigriceps isolate 21919_18 MHC class II antigen beta chain (DRB) mRNA DRB*W2902 allele<br/>Aotus nigriceps isolate 16584_5 MHC class II antigen beta chain (DRB) mRNA DRB*W3801 allele<br/>Aotus nigriceps isolate 20483_1 MHC class II antigen beta chain (DRB) mRNA DRB*W4201 allele<br/>Aotus nigriceps isolate 20848_16 MHC class II antigen beta chain (DRB) mRNA DRB*W4301 allele<br/>Aotus nigriceps isolate 20596_4 MHC class II antigen beta chain (DRB) mRNA DRB*W4401 allele<br/>Aotus nigriceps MHC class II antigen beta chain (Aoni-DRB1) gene Aoni-DRB1*0301 allele<br/>Aotus nigriceps isolate 21791_15 MHC class II antigen beta chain (DRB1) mRNA DRB1*0304 allele<br/>Aotus nigriceps MHC class II antigen (DRB1) mRNA DRB1*0307 allele<br/>Aotus nigriceps isolate 20456_8 MHC class II antigen beta chain (DRB1) mRNA DRB1*W1801 allele<br/>Aotus nigriceps isolate 20506_2 MHC class II antigen beta chain (DRB3) mRNA DRB3*0601 allele<br/>Aotus trivirgatus MHC class II DRB*W1801 gene exon<br/>Aotus trivirgatus MHC class II DRB1*0301 gene exon<br/>Aotus trivirgatus partial DRB1 gene for MHC class II antigen DRB1*0303 allele exon 2<br/>Aotus trivirgatus partial DRB3 gene for MHC class II antigen DRB3*0602 allele exon 2<br/>Aotus trivirgatus partial DRB3 gene for MHC class II antigen DRB3*0603 allele exon 2<br/>Aotus trivirgatus MHC class II DRB gene exon<br/>Aotus vociferans MHC class II antigen (DRB) mRNA DRB*W130101 allele<br/>Aotus vociferans isolate 20789_1 MHC class II antigen beta chain (DRB) mRNA DRB*W1303 allele<br/>Aotus vociferans MHC class II antigen (DRB) mRNA DRB*W4301 allele<br/>Aotus vociferans isolate 16704_9 MHC class II antigen beta chain (DRB) mRNA DRB*W4701 allele<br/>Aotus vociferans MHC class II antigen (DRB1) mRNA DRB1*0301 allele</p> | <p>AY429143<br/>AY429142<br/>AF132767<br/>AY563223<br/>AY563218<br/>AY563255<br/>DQ162705<br/>AF132768<br/>AF169487<br/>AF129806<br/>DQ162688<br/>AY563201<br/>AF132766<br/>AY563194<br/>AY563209<br/>AY563206<br/>AY563180<br/>AY563181<br/>AY563183<br/>DQ162645<br/>AF129793<br/>AF129792<br/>AF129794<br/>AF129796<br/>AF129798<br/>AF132760<br/>AF132761<br/>AY563188<br/>AY563193<br/>AF129799<br/>AF129800<br/>AF129801<br/>AY563212<br/>AY563261<br/>DQ162732<br/>AY563259<br/>AY563246<br/>AY563245<br/>AY563253<br/>AY563249<br/>AY563247<br/>AF129797<br/>AY563242<br/>DQ162711<br/>AY563257<br/>AY563229<br/>L12477<br/>L12472<br/>AJ544176<br/>AJ544174<br/>AJ544175<br/>L12474<br/>DQ162634<br/>AY563258<br/>DQ162630<br/>AY563227<br/>DQ162628</p> |

| Sequence                                                                                                                                                                                                                                                                                                                                                                                                                                                                                                                                                                                       | Remarks                                                                                                                                                                                                                                                                                                                                                                                                                                                                                                                                                                                                                                                                                                                                                                                                                                                                                                                                                                                                                                                                                                                                                                                                                                                                                                                                                                                                                                                                                                                                                                                                                                                                                                                                                                                                                                                                                                                                                                                                                                                                                                                                                                                                                                                                                                                                                                                                                                            | Accession Number Genbank                                                                                                                                                                                                                                                                                                                                                                                 |
|------------------------------------------------------------------------------------------------------------------------------------------------------------------------------------------------------------------------------------------------------------------------------------------------------------------------------------------------------------------------------------------------------------------------------------------------------------------------------------------------------------------------------------------------------------------------------------------------|----------------------------------------------------------------------------------------------------------------------------------------------------------------------------------------------------------------------------------------------------------------------------------------------------------------------------------------------------------------------------------------------------------------------------------------------------------------------------------------------------------------------------------------------------------------------------------------------------------------------------------------------------------------------------------------------------------------------------------------------------------------------------------------------------------------------------------------------------------------------------------------------------------------------------------------------------------------------------------------------------------------------------------------------------------------------------------------------------------------------------------------------------------------------------------------------------------------------------------------------------------------------------------------------------------------------------------------------------------------------------------------------------------------------------------------------------------------------------------------------------------------------------------------------------------------------------------------------------------------------------------------------------------------------------------------------------------------------------------------------------------------------------------------------------------------------------------------------------------------------------------------------------------------------------------------------------------------------------------------------------------------------------------------------------------------------------------------------------------------------------------------------------------------------------------------------------------------------------------------------------------------------------------------------------------------------------------------------------------------------------------------------------------------------------------------------------|----------------------------------------------------------------------------------------------------------------------------------------------------------------------------------------------------------------------------------------------------------------------------------------------------------------------------------------------------------------------------------------------------------|
| <b>Sequences of primates MHC-DRB (molecular phylogenetic analysis exon 2 + intron 2)</b>                                                                                                                                                                                                                                                                                                                                                                                                                                                                                                       |                                                                                                                                                                                                                                                                                                                                                                                                                                                                                                                                                                                                                                                                                                                                                                                                                                                                                                                                                                                                                                                                                                                                                                                                                                                                                                                                                                                                                                                                                                                                                                                                                                                                                                                                                                                                                                                                                                                                                                                                                                                                                                                                                                                                                                                                                                                                                                                                                                                    |                                                                                                                                                                                                                                                                                                                                                                                                          |
| Caja_DRB_G_01<br>Caja_DRB_G_02<br>Caja_DRB_G_03<br>Caja_DRB_G_04<br>Caja_DRB_G_05<br>Caja_DRB_G_06<br>SAOE-DRB1*0303<br>SAOE-DRB3*0501<br>SAOE-DRB11*0102<br>SAOE-DRB11*0105<br>SAOE-DRB*W2209<br>CAJA-DRB1*0304<br>CAMO-DRB1*0302<br>CAMO-DRB3*0503<br>CAMO-DRB3*0504<br>CEAP-DRB*W1301<br>CAJA-DRB*W1201                                                                                                                                                                                                                                                                                     | 43380-44258 Callithrix jacchus BAC clone CH259-77F15 from chromosome unknown, complete sequence<br>105908-107178 Callithrix jacchus BAC clone CH259-77F15 from chromosome unknown, complete sequence<br>192613-193403 Callithrix jacchus BAC clone CH259-77F15 from chromosome unknown, complete sequence<br>138963-138357 Callithrix jacchus BAC clone CH259-1507 from chromosome unknown, complete sequence<br>76772-75338 Callithrix jacchus BAC clone CH259-1507 from chromosome unknown, complete sequence<br>161835-162584 Callithrix jacchus BAC clone CH259-49P2 from chromosome unknown, complete sequence<br>Saguinus oedipus MHC class II antigen (SAOE-DRB1) pseudogene<br>Saguinus oedipus MHC class II antigen (SAOE-DRB3) pseudogene<br>Saguinus oedipus MHC class II antigen (SAOE-DRB11) gene<br>Saguinus oedipus MHC class II antigen (SAOE-DRB11) gene<br>Saguinus oedipus MHC class II antigen (SAOE-DRB) gene<br>Callithrix jacchus MHC class II antigen (CAJA-DRB1) gene<br>Callicebus moloch MHC class II antigen (CAMO-DRB1) gene<br>Callicebus moloch MHC class II antigen (CAMO-DRB3) gene<br>Callicebus moloch MHC class II antigen (CAMO-DRB3) pseudogene<br>Cebus apella MHC class II antigen (CEAP-DRB) gene<br>Callithrix jacchus MHC class II antigen (CAJA-DRB) gene                                                                                                                                                                                                                                                                                                                                                                                                                                                                                                                                                                                                                                                                                                                                                                                                                                                                                                                                                                                                                                                                                                                                              | AC242730<br>AC242730<br>AC242730<br>AC243457<br>AC243457<br>AC242576<br>AF173332<br>AF173333<br>AF173334<br>AF173335<br>AF173336<br>AF173337<br>AF173338<br>AF173339<br>AF173340<br>AF173341<br>AF173348                                                                                                                                                                                                 |
| Mamu_DRB_G_01<br>Mamu_DRB_G_02<br>Mamu_DRB_G_03ps<br>Mamu_DRB_G_05<br>Mamu_DRB_G_06<br>Mamu_DRB_G_07<br>Mamu_DRB_G_08<br>Mamu_DRB_G_04<br>Chae_DRB_G_01<br>Chae_DRB_G_02<br>Chae_DRB_G_03<br>Chae_DRB_G_04<br>MAFA-DRB*W3301<br>MAAR-DRB1*0301<br>MAAR-DRB1*0302<br>MAAR-DRB1*0701<br>MAFA-DRB*W301<br>MAMU-DRB*W402<br>MAAR-DRB*W601<br>MAAR-DRB5*0301<br>MAMU-DRB6*0106<br>Mamu-DRB*W201<br>Mamu-DRB*W305<br>Mamu-DRB*W603<br>Mamu-DRB*W2507<br>Mamu-DRB1*0303<br>Mamu-DRB1*0306<br>Mamu-DRB1*0309<br>Mamu-DRB1*0404<br>Mamu-DRB1*1007<br>Mamu-DRB3*0405<br>Mamu-DRB3*0408<br>Mamu-DRB5*0301 | 140068-140822 Macaca mulatta Major Histocompatibility Complex BAC MMU012K22<br>28917-29606 Macaca mulatta Major Histocompatibility Complex BAC MMU012K22<br>111593-112214 Macaca mulatta Major Histocompatibility Complex BAC MMU012K22<br>c75283-74620 Macaca mulatta Major Histocompatibility Complex BAC MMU248N17<br>c151148-150454 Macaca mulatta Major Histocompatibility Complex BAC MMU248N17<br>c29018-28359 Macaca mulatta Major Histocompatibility Complex BAC MMU248N17<br>c26068-25409 Macaca mulatta Major Histocompatibility Complex BAC MMU281E18<br>173697-174407 Macaca mulatta Major Histocompatibility Complex BAC MMU370O02<br>63309-64000 Chlorocebus aethiops BAC clone CH252-249I23 from chromosome 6<br>143590-144262 Chlorocebus aethiops BAC clone CH252-249I23 from chromosome 6<br>111557-112224 Chlorocebus aethiops BAC clone CH252-249I23 from chromosome 6<br>21256-21901 Chlorocebus aethiops BAC clone CH252-249I23 from chromosome 6<br>Macaca fascicularis MHC class II antigen (MAFA-DRB) gene<br>Macaca arctoides MHC class II antigen (MAAR-DRB1) gene<br>Macaca arctoides MHC class II antigen (MAAR-DRB1) gene<br>Macaca arctoides MHC class II antigen (MAAR-DRB1) gene<br>Macaca fascicularis MHC class II antigen (MAFA-DRB) gene<br>Macaca mulatta MHC class II antigen (MAMU-DRB) gene<br>Macaca arctoides MHC class II antigen (MAAR-DRB) pseudogene<br>Macaca arctoides MHC class II antigen (MAAR-DRB5) gene<br>Macaca mulatta MHC class II antigen (MAMU-DRB6) pseudogene<br>7681-8413 Macaca mulatta partial Mamu-DRB gene for MHC class II antigen<br>7704-8400 Macaca mulatta partial Mamu-DRB gene for MHC class II antigen<br>6501-7247 Macaca mulatta partial Mamu-DRB gene for MHC class II antigen<br>6540-7190 Macaca mulatta partial Mamu-DRB gene for MHC class II antigen<br>3087-3748 Macaca mulatta partial Mamu-DRB gene for MHC class II antigen<br>Macaca mulatta partial Mamu-DRB1 gene for MHC class II antigen<br>7622-8327 Macaca mulatta partial Mamu-DRB1 gene for MHC class II antigen<br>2994-3688 Macaca mulatta partial Mamu-DRB1 gene for MHC class II antigen<br>8014-8684 Macaca mulatta partial Mamu-DRB1 gene for MHC class II antigen<br>Macaca mulatta partial Mamu-DRB3 gene for MHC class II antigen<br>2995-3667 Macaca mulatta partial Mamu-DRB3 gene for MHC class II antigen<br>976-8612 Macaca mulatta partial Mamu-DRB5 gene for MHC class II antigen | AC148663<br>AC148663<br>AC148663<br>AC148697<br>AC148697<br>AC148697<br>AC148700<br>AC148706<br>AC241608<br>AC241608<br>AC241608<br>AC241608<br>AF173349<br>AF173350<br>AF173351<br>AF173352<br>AF173353<br>AF173354<br>AF173355<br>AF173356<br>AF173357<br>AM910410<br>AM910411<br>AM910412<br>AM910413<br>AM910414<br>AM910415<br>AM910417<br>AM910419<br>AM910420<br>AM910421<br>AM910422<br>AM910423 |

| Sequence                                                                                                                                                                                                                                                                                                                                                                                                                                                     | Remarks                                                                                                                                                                                                                                                                                                                                                                                                                                                                                                                                                                                                                                                                                                                                                                                                                                                                                                                                                                                                                                                                                                                                                                                                                                                                                                                                                                                                                                                                                                                                                                                                                                                                                                                                                            | Accession Number Genbank                                                                                                                                                                                                                                                                                          |
|--------------------------------------------------------------------------------------------------------------------------------------------------------------------------------------------------------------------------------------------------------------------------------------------------------------------------------------------------------------------------------------------------------------------------------------------------------------|--------------------------------------------------------------------------------------------------------------------------------------------------------------------------------------------------------------------------------------------------------------------------------------------------------------------------------------------------------------------------------------------------------------------------------------------------------------------------------------------------------------------------------------------------------------------------------------------------------------------------------------------------------------------------------------------------------------------------------------------------------------------------------------------------------------------------------------------------------------------------------------------------------------------------------------------------------------------------------------------------------------------------------------------------------------------------------------------------------------------------------------------------------------------------------------------------------------------------------------------------------------------------------------------------------------------------------------------------------------------------------------------------------------------------------------------------------------------------------------------------------------------------------------------------------------------------------------------------------------------------------------------------------------------------------------------------------------------------------------------------------------------|-------------------------------------------------------------------------------------------------------------------------------------------------------------------------------------------------------------------------------------------------------------------------------------------------------------------|
| <b>Sequences of primates MHC-DRB (molecular phylogenetic analysis exon 2 + intron 2)</b>                                                                                                                                                                                                                                                                                                                                                                     |                                                                                                                                                                                                                                                                                                                                                                                                                                                                                                                                                                                                                                                                                                                                                                                                                                                                                                                                                                                                                                                                                                                                                                                                                                                                                                                                                                                                                                                                                                                                                                                                                                                                                                                                                                    |                                                                                                                                                                                                                                                                                                                   |
| HLA_DRB1*010101<br>HLA_DRB1*010201<br>HLA_DRB1*040101<br>HLA_DRB1*0405<br>HLA_DRB1*070101<br>HLA_DRB1*08:03:02<br>HLA_DRB1*110101<br>HLA_DRB1*110401<br>HLA_DRB1*12:01:01<br>HLA_DRB1*130201<br>HLA_DRB1*140101<br>HLA_DRB1*140501<br>HLA_DRB1*1501<br>HLA_DRB1*16<br>HLA_DRB1*1602<br>HLA_DRB3*01012<br>HLA_DRB3*020201<br>HLA_DRB4*01030101<br>HLA_DRB5*0101<br>HLA_DRB6ps<br>HLA_DRB7ps<br>HLA_DRB1*10:01:01<br>HLA_DRB1*15:02:01<br>HLA_DRB1*03-AL929581 | Homo sapiens HLA-DRB1 gene for MHC class II antigen<br>Homo sapiens voucher Coriell Cell Repository DNA sample NA01018<br>Homo sapiens major histocompatibility complex, class II, DR53 haplotype (DR53)<br>Homo sapiens MHC class II antigen (HLA-DRB1) gene, HLA-DRB1*0404<br>Human DNA sequence from clone DADB-102D14 on chromosome 6<br>Homo sapiens HLA-DRB1 gene for MHC class II antigen<br>Homo sapiens voucher Coriell Cell Repository DNA sample NA00576<br>Homo sapiens voucher Coriell Cell Repository DNA sample NA14661<br>Homo sapiens HLA-DRB1 gene for major histocompatibility complex<br>Homo sapiens voucher Coriell Cell Repository DNA sample NA14663<br>Homo sapiens voucher Coriell Cell Repository DNA sample NA10540<br>Homo sapiens voucher Coriell Cell Repository DNA sample NA04535<br>Homo sapiens major histocompatibility complex, class II, DR51 haplotype (DR51) on chromosome 6<br>Homo sapiens major histocompatibility complex, class II<br>Homo sapiens MHC class II antigen (HLA-DRB1) gene DR51<br>Homo sapiens major histocompatibility complex, class II, DR52 haplotype (DR52) on chromosome 6<br>Human DNA sequence from clone DAQB-97F8 on chromosome 6<br>Homo sapiens major histocompatibility complex, class II, DR53 haplotype (DR53)<br>Homo sapiens major histocompatibility complex, class II, DR51 haplotype (DR51) on chromosome 6<br>Homo sapiens major histocompatibility complex, class II, DR51 haplotype (DR51) on chromosome 6<br>Homo sapiens major histocompatibility complex, class II, DR53 haplotype (DR53)<br>Homo sapiens MHC class II antigen (HLA-DRB1) gene<br>Homo sapiens HLA-DRB1 gene for MHC class II antigen<br>c91958-91273 Human DNA sequence from clone DAQB-97F8 on chromosome 6 | AM493435<br>AY663400<br>NG_002433<br>AB715390<br>CR753309<br>FN823238<br>AY663412<br>AY663394<br>AB715399<br>AY663413<br>AY663405<br>AY663408<br>NG_002432<br>NG_002432<br>AB774985<br>NG_002392<br>AL929581<br>NG_002433<br>NG_002432<br>NG_002432<br>NG_002432<br>NG_002433<br>JN157606<br>AB774991<br>AL929581 |
| Patr-DRB1*020101<br>Patr-DRB3*0208<br>Patr-DRB1*10:01<br>Gogo_DRB_01<br>Patr-DRB*W902<br>Patr-DRB3*01020101<br>Patr_DRB_01<br>Gogo_DRB_02<br>Gogo_DRB_03<br>Gogo_DRB_04<br>Gogo_DRB_05<br>Patr-DRB4*02:01<br>Poab_DRB_01<br>Patr_DRB_01                                                                                                                                                                                                                      | Pan troglodytes partial Patr-DRB1 gene for MHC class II antigen, Patr-DRB1*020101<br>Pan troglodytes partial Patr-DRB3 gene for MHC class II antigen<br>Pan troglodytes versus partial patr-DRB1 gene for MHC class II antigen<br>44822-45507 Gorilla gorilla voucher Coriell Cell Repository DNA sample NG05251<br>Pan troglodytes partial Patr-DRB gene for MHC class II antigen<br>Pan troglodytes partial Patr-DRB3 gene for MHC class II antigen<br>Pan troglodytes voucher Coriell Cell Repository DNA sample NS03646<br>c218276-217597 Gorilla DNA sequence from clone CH255-114D6, complete sequence<br>c218276-217597 Gorilla DNA sequence from clone CH255-114D6, complete sequence<br>73853067:151462-152106 Gorilla DNA sequence from clone CH255-351B13<br>73853067:151462-152106 Gorilla DNA sequence from clone CH255-351B13<br>5938-6579 Pan troglodytes troglodytes partial patr-DRB4<br>200269-200926 Pongo abelii BAC clone CH276-191M9 from chromosome 6<br>27628-28281 Pan troglodytes genomic DNA, chromosome 5                                                                                                                                                                                                                                                                                                                                                                                                                                                                                                                                                                                                                                                                                                                              | AM910425<br>AM910428<br>HE800526<br>AY663402<br>AM910424<br>AM910426<br>AY663401<br>CU104652<br>CU104652<br>CT025711<br>CT025711<br>CT025711<br>HE800525<br>AC206450<br>AP006503                                                                                                                                  |

**Table S2. Microsatellite sequence and length in Platyrhini MHC-DRB.**

| SEQUENCE            | MICROSATELLITE                    |                                                                                                                                                                                                                                                                                                                                                                                                                                                                                                                                                         |                                    | LENGTH |                |
|---------------------|-----------------------------------|---------------------------------------------------------------------------------------------------------------------------------------------------------------------------------------------------------------------------------------------------------------------------------------------------------------------------------------------------------------------------------------------------------------------------------------------------------------------------------------------------------------------------------------------------------|------------------------------------|--------|----------------|
|                     | FIRST PART                        | CENTRAL PART                                                                                                                                                                                                                                                                                                                                                                                                                                                                                                                                            | FINAL PART                         |        | LZSize (Bytes) |
| Aona<br>DRB3*062501 | CA(GA)4CT(GA)4CT(GA)4C<br>C       | (GA)5CACA(GA)2CACT(GA)4CA(GA)6CT(GA)4CAGT((GA)3,3,4CT)(GA)4CACT(GA)4CACAGT(GA)2CA(GA)2AACA(GA)2AAGACT(GA)3TACACT(GA)4CA(GA)2CT(GA)3CA(GA)3CACA(GA)3CA(GA)3CTGAAAGACT(GA)4CA((GA)3,4CT)(GA)3AAGACT((GA)4,3CT)(GA)3AACA((GA)2,3CT)(GA)3CACT(GA)3CT(GA)3CACAGATA(GA)2TT((GA)3,5CT)(GA)3CACTGATA((GA)2,5,3CT)                                                                                                                                                                                                                                               | (GA)15C<br>T(GA)3G<br>CGCCTT<br>G  | 314    | 4333           |
| Aovo<br>DRB3*0601   | CA(GA)4CT(GA)4CT(GA)4C<br>C       | (GA)5(CA)2(GA)2CACT(GA)4CAGAG(GA)4CT(GA)4CAGT((GA)3,3,4CT)(GA)4CACT(GA)4CACAGT(GA)2CA(GA)2AACA(GA)2AAGACT(GA)3TACACT(GA)4CA(GA)2CT(GA)3CA(GA)3CACA(GA)3CA(GA)3CTGAAAGACT(GA)4CA((GA)3,4CT)(GA)3AAGACT((GA)4,3)(GA)3AACA((GA)2,3CT)(GA)3CACT(GA)3CT(GA)3CACAGATA(GA)2TT((GA)3,5CT)(GA)3CACTGATA((GA)2,5,3CT)                                                                                                                                                                                                                                             | (GA)15C<br>T(GA)3G<br>CGCCTT<br>G  | 310    | 4343           |
| Aona<br>DRB3*062502 | CA(GA)4CT(GA)4CC(GA)4C<br>C       | (GA)5CACA(GA)2CACT(GA)4CA(GA)6CT(GA)4CAGT((GA)3,3,4CT)(GA)4CACT(GA)4CACAGT(GA)2CA(GA)2AACA(GA)2AAGACT(GA)3TACACT(GA)4CA(GA)2CT((GA)3,3CA)(GA)3CA(GA)3CTGAAAGACT(GA)4CA((GA)3,4CT)GA AAGACT((GA)4,3CT)(GA)3AACA((GA)2,3CT)(GA)3CACT(GA)3CT(GA)3CACAGATA(GA)2TT((GA)3,5CT)(GA)3CACTGATA(GA)2CT                                                                                                                                                                                                                                                            | (GA)16C<br>T(GA)3G<br>CGCCTT<br>G  | 294    | 4310           |
| Aona<br>DRB3*0626   | CA(GA)4CT(GA)4CT(GA)4C<br>C       | (GA)5CACA(GA)2CACT(GA)4CA(GA)5CT(GA)4CAGT((GA)3,3,4CT)(GA)4CACT(GA)4CACAGT(GA)2CA(GA)2AACA(GA)2AAGACT(GA)3TACACT(GA)4CA(GA)2CT((GA)3,3CA)(GA)3CA(GA)3CTGAAAGACT(GA)4CA((GA)3,4CT)(GA)3AAGACT((GA)4,3CT)(GA)3AACA((GA)2,3CT)(GA)3CACT(GA)3CT(GA)3CACAGATA(GA)2TT((GA)3,5CT)(GA)3CACTGATA((GA)2,5,3CT)                                                                                                                                                                                                                                                    | (GA)15C<br>T(GA)3G<br>CGCCTT<br>G  | 312    | 4357           |
| Aona<br>DRB3*0628   | CA(GA)4CT(GA)4CT(GA)4C<br>C       | (GA)5CACA(GA)2CACT(GA)4CA(GA)6CT(GA)4CAGT((GA)3,3,4CT)(GA)4CACT(GA)4CAGAG((GA)2,3CA)(GA)2AAGACT(GA)3CA(GA)2CT(GA)3TACACT(GA)4CA(GA)2CT((GA)3,3CA)CT(GA)4CA(GA)3CTGAAAGACT(GA)4CA((GA)4,5,3CT)(GA)3TACTTAGG(GA)2CT(GA)4CA(GA)3CT(GA)3AAGACT((GA)4,3,3CT)(GA)3AACA((GA)2,3CT)(GA)3CACT(GA)3CT(GA)3CACAGATA(GA)2TT((GA)3,5CT)(GA)3CACTGATA((GA)5,3)                                                                                                                                                                                                        | (GA)11A<br>ACT(GA)<br>3GCAC<br>TTG | 346    | 4855           |
| Aona<br>DRB3*0627   | CA(GA)4CT(GA)4CT(GA)4C<br>C       | (GA)5CACA(GA)2CACT(GA)4CA(GA)6CT(GA)4CAGT((GA)3,3,4CT)(GA)4CACT(GA)4CAGAG((GA)2,3CA)(GA)2AAGACT(GA)3CA(GA)4CT(GA)3TACACT(GA)4CA(GA)2CT((GA)3,3CA)CT(GA)4CA(GA)3CTGAAAGACT(GA)4CA(GA)4CT(GA)4GGCT(GA)3CT(GA)3TACTTAGG(GA)2CT(GA)4CA(GA)3CT(GA)3AAGACT((GA)4,3,3CT)(GA)3AACA((GA)2,3CT)(GA)3CACT(GA)3CT(GA)3CACAGATA(GA)2TT((GA)3,5CT)(GA)3CACTGATA((GA)2,5,3CT)                                                                                                                                                                                          | (GA)10A<br>ACT(GA)<br>3GCAC<br>TTG | 350    | 4951           |
| Aona<br>DRB3*0615   | CA(GA)4CT(GA)4CT(GA)4C<br>C       | (GA)5CACA(GA)2CACT(GA)4CA(GA)6CT(GA)4CAGT((GA)3,3,4CT)(GA)4CACT(GA)4CACAGT(GA)2CA(GA)2AACA(GA)2AAGACT(GA)3TACACT(GA)4CA(GA)2CT((GA)3,3CA)(GA)3CA(GA)3CTGAAAGACT(GA)4CA((GA)3,4CT)(GA)3AAGACT((GA)4,3CT)(GA)3AACA((GA)2,3CT)(GA)3CACT(GA)3CT(GA)3CACAGATA(GA)2TT((GA)3,5CT)(GA)3CACTGATA((GA)2,5,3CT)                                                                                                                                                                                                                                                    | (GA)15C<br>T(GA)3G<br>CGCCTT<br>G  | 314    | 4333           |
| Aona<br>DRB1*0329GA | CA(GA)4CTGAAA(GA)2CT(GA)4CACTGAGT | (GA)2GT((GA)2,3CA)(GA)2AAGACT(GACA)2(GA)4CT(GA)2GGTACACT(GA)4CAGAGT((GA)2,3CA)GAGTAAGACTGACA(GA)4CT(GA)3TACACT(GA)4CA(GA)2CT((GA)3,3CA)CT(GA)4CA(GA)3CTGAAAGACT(GA)4CA((GA)4,5,3CT)(GA)3TACTTAGG(GA)2CT(GA)4CA(GA)3CT(GA)2CAGACT(GA)3AAGACT(GA)6CT(GA)3GGCT(GA)5CTGAGG(GA)2CA(GA)2AT(GA)5CT(GA)3CAAGACA(GA)2CT(GA)4T(GA)2CA((GA)4,4CT)AA(GA)3CTGAGG((GA)2,4CT)GAAAGACT(GA)5CT(GA)4CAAGACA(GA)2CT(GA)4T(GA)2CA(GA)4CT(GA)3AAGACT(GA)3CA((GA)2,3,2CT)(GA)3AATAGACT(GA)3CT(GA)3CACT(GA)3CT(GA)3CACAGATA(GA)2TT((GA)3,5CT)(GA)3CACTGATA((GA)3,5,3CT)        | (GA)23C<br>T(GA)3G<br>CGCCG<br>TG  | 446    | 7249           |
| Aona<br>DRB1*031701 | CA(GA)4CT(GA)4CTACT               | (GA)4GT((GA)2,3CA)(GA)2AAGACTGACAGACA(GA)4CT(GA)2GGTACACT(GA)4CAGAGT((GA)2,3CA)GAGTAAGACTGACA(GA)4CT(GA)3TACACT(GA)4CA(GA)2CT(GA)3CAGC(GA)2CACT(GA)4CA(GA)3CTGAAAGACT(GA)4CA((GA)4,5,3CT)(GA)3TACTTAGG(GA)2CT(GA)4CA(GA)3CT(GA)2CAGACT(GA)3AAGACT(GA)6CT(GA)3GGCT(GA)5CTGAGG(GA)2CC(GA)2AT(GA)5CT(GA)3CAAGACA(GA)2CT(GA)4T(GA)2CA((GA)4,4CT)AA(GA)3CTGAGG((GA)2,4CT)GA AAGACT(GA)5CT(GA)4CAAGACA(GA)2CT(GA)4T(GA)2CA(GA)4CT(GA)3AAGACT(GA)3CA((GA)2,3,2CT)(GA)3AATAGACT(GA)3CT(GA)3CACT(GA)3CT(GA)3CACAGATA(GA)2TT((GA)3,5CT)(GA)3CACTGATA((GA)2,5,3CT) | (GA)25C<br>T(GA)3G<br>CGCCG<br>TG  | 462    | 7205           |

|                   |                             |                                                                                                                                                                                                                                                                                                                                                                                                                                                                         |                                  |     |      |
|-------------------|-----------------------------|-------------------------------------------------------------------------------------------------------------------------------------------------------------------------------------------------------------------------------------------------------------------------------------------------------------------------------------------------------------------------------------------------------------------------------------------------------------------------|----------------------------------|-----|------|
| Aovo<br>DRB1*0304 | CA(GA)4CT(GA)4CC(GA)5CACA   | (GA)2CACT(GA)4CA(GA)6CT(GA)4CAGT((GA)3,3CT)(GA)4CACT(GA)4CAGAGT(GA)2CA(GA)2AACA(GA)2AAGACT(GA)3TACACT(GA)4CA(GA)2CT((GA)3,3CA)CT(GA)4CA(GA)3CTGAAAGACT(GA)4CA(GA)3CT(GA)3AAGACT((GA)4,3CT)(GA)3AACA((GA)2,3CT)(GA)3CACT(GA)3CT(GA)3CACAGATA(GA)2TT(GA)3CT(GA)4CACTGATA((GA)2,4,3CT)                                                                                                                                                                                     | (GA)11A<br>ACT(GA)3GCAC<br>TTG   | 274 | 3949 |
| Aovo<br>DRB1*0305 | CA(GA)4CT(GA)4CC(GA)5CACA   | (GA)2CACT(GA)4CA(GA)6CT(GA)4CAGT((GA)3,3,2CT)(GA)4CACT(GA)4CAGAGG((GA)2,3CA)(GA)2AAGACT(GA)3CA(GA)3CT(GA)3TACACT(GA)4CA(GA)2CT(GA)3CAGG(GA)2CACT(GA)4CA(GA)3CTGAAAGACT(GA)4CA(GA)4CT((GA)5,3CT)(GA)3TACTTAGG(GA)2CT<br>(GA)4CA(GA)3CT(GA)3AAGACTCT(GA)4CT(GA)3AACAGGGACT(GA)3CT(GA)3CACT(GA)3CT(GA)3CACAGATAGA<br>AATT(GA)3CT(GA)3CACTGATA ((GA)2,5,3CT)(GA)3CA(GA)2CT                                                                                                  | (GA)9A<br>ACT(GA)3GCAC<br>TTG    | 336 | 4282 |
| Aovo<br>DRB1*0306 | CA(GA)4CT(GA)4CC(GA)5CACA   | (GA)2CACT(GA)4CA(GA)6CT(GA)4CAGT((GA)3,3CT)(GA)4CT(GA)4CACT(GA)4CAGAGT(GA)2CA(GA)2AACA(GA)2AAGACT(GA)2AATACACT(GA)4CA(GA)2CT((GA)3,3CA)CT(GA)4CA(GA)3CTGAAAGACT(GA)4CA(GA)3CT(GA)3AAGACT((GA)4,3CT)(GA)3AACA((GA)2,3CT)(GA)3CACT(GA)3CT(GA)3CACAGATA(GA)2TT(GA)3CT(GA)3CACTGATA((GA)2,4,3CT)                                                                                                                                                                            | (GA)13A<br>ACT(GA)3GCAC<br>TTG   | 282 | 4102 |
| Aovo<br>DRB1*0307 | CA(GA)4CT(GA)4CC(GA)7CACA   | (GA)2CACT(GA)4CA(GA)6CT(GA)4CAGT((GA)3,3,4CT)(GA)4CACT(GA)4CAGAGT(GA)2CA(GA)2AACA(GA)2AAGACT(GA)2AATACACT(GA)4CA(GA)2CT((GA)3,3CA)CT(GA)4CA(GA)3CTGAAAGACT(GA)4CA(GA)3CT(GA)3AAGACT((GA)4,3CT)(GA)3AACA((GA)2,3CT)(GA)3CACT(GA)3CT(GA)3CACAGATA(GA)2TT(GA)3CT(GA)3CACTGATA((GA)2,4,3CT)                                                                                                                                                                                 | (GA)13A<br>ACT(GA)3GCAC<br>TTG   | 286 | 4096 |
| Aona<br>DRB*W8901 | CA(GA)2CA(GA)2CT(GA)4CT     | (GA)7AT((GA)4,5,4CT)(GA)3TA(GA)2CTGAAAGAC(GA)2CA(GA)3AACT(GA)3AACATA(GA)2CT(GA)5CACA                                                                                                                                                                                                                                                                                                                                                                                    | (GA)5CA<br>GAGC<br>(GA)4<br>GCG  | 114 | 1833 |
| Aona<br>DRB*W1808 | CA(GA)5CT(GA)4CT(GA)10CACA  | (GA)4TAGACA(GA)2CA((GA)3,3CT)GT((GA)4,4CT)GTGCAAGACC((GA)5,2CT)(GA)3TT(GA)4CA(GA)2CT(GA)3GGCT(GA)3CTCG(GA)3CTGAGC(GA)3CT(GA)2TAGACT(GA)3AACT(GA)3TACT                                                                                                                                                                                                                                                                                                                   | (GA)6<br>(GC)3<br>GA<br>CAGCG    | 168 | 2893 |
| Aona<br>DRB*W1806 | CA(GA)5CT(GA)4CT(GA)10CACA  | (GA)4TAGACA(GA)2CA((GA)3,3CT)GT(GA)4CTGTGCAAGACC((GA)5,2CT)(GA)3TT(GA)4CA((GA)2,4CT)(GA)3CTCG(GA)3CTGAGC(GA)3CT(GA)2TAGACT(GA)3AACT(GA)3TACT                                                                                                                                                                                                                                                                                                                            | (GA)6<br>(GC)3GA<br>CAGCG        | 162 | 2729 |
| Aovo<br>DRB*W1803 | CA(GA)5CT(GA)15CACA         | (GA)4TAGACA(GA)2CA((GA)3,3CT)GT(GA)4CT(GA)4CTGTGCAAGACC((GA)5,2,4CT)(GA)3CTCG(GA)3CTGAGC(GA)3CT(GA)2TAGACT(GA)3AACT(GA)3TACT                                                                                                                                                                                                                                                                                                                                            | (GA)6<br>(GC)3GA<br>CAGCG        | 154 | 2479 |
| Aovo<br>DRB*W1801 | CA(GA)7CAC<br>A             | (GA)4TAGACA(GA)2CA((GA)3,3CT)GT((GA)4,4CT)GTGCAAGACC(GA)5TT(GA)2CT(GA)2TT(GA)4CA((GA)2,4CT)(GA)3CTCG(GA)3CTGAGC(GA)3CT(GA)2TAGACT(GA)3AACT(GA)3TACT                                                                                                                                                                                                                                                                                                                     | (GA)6<br>(GC)3GA<br>CAGCG        | 144 | 2591 |
| Aovo<br>DRB*W1802 | CA(GA)5CT(GA)4CT(GA)13CACA  | (GA)4TAGACA((GA)2,3CT)GT(GA)4CTGTGCAAGACC((GA)5,2CT)(GA)3TT(GA)4CA((GA)2,4CT)(GA)3CTCG(GA)3CTGAGC(GA)3CT(GA)2TAGACT(GA)3AACA(GA)2TACT                                                                                                                                                                                                                                                                                                                                   | (GA)6<br>(GC)3GA<br>CAGCG        | 160 | 2663 |
| Aona<br>DRB1*0328 | CA(GA)4CT(GA)4CT(GA)4C<br>C | (GA)5CACA(GA)2CACT(GA)4CA(GA)6CT(GA)4CAGT((GA)3,3,2CT)(GA)4CACT(GA)4CAGAGT((GA)2,3CA)(GA)2AAGGCTGACAGACA<br>(GA)4CT(GA)3TACACT(GA)4CA(GA)2CT(GA)3CAGACACTCAGACACT((GA)4,3CT)GT(GA)5CT(GA)4CA(GA)4CT(GA)4CACT(GA)4CA<br>(GA)3CTGAAAGACT(GA)3TACTTAGG(GA)2CT(GA)3AACA((GA)3,4CT)(GA)3AAGACT(GA)5CT(GA)3GGCT(GA)3CTGAGG(GA)2CA(GA)2AT(GA)5CT(GA)3TAAGACA(GA)2CT(GA)4T(GA)2CA(GA)4CT(GA)3AAGACT(GA)3CA((GA)3,3CT)(GA)4CA((GA)2,3,3CT)(GA)3CACAGATA(GA)2TT((GA)3,5CT)GGGGGGG | (GA)11C<br>T(GA)3G<br>CACGT<br>G | 414 | 6113 |

|                   |                         |                                                                                        |                                     |     |      |
|-------------------|-------------------------|----------------------------------------------------------------------------------------|-------------------------------------|-----|------|
| Aovo<br>DRB*W4501 | CA(GA)2CA(GA)2CT(GA)4CT | (GA)3CAGACT(GA)5GT(GA)12G((GA)2,4CA)(GA)2GGCT(GA)3GCCA(GA)3CT(GA)2AAGACA               | (GA)2GC<br>CAGAG<br>CCA(GA)<br>3GCA | 98  | 1593 |
| Aovo<br>DRB*W8701 | CA(GA)4CT               | (GA)6CT(GA)5CT(GA)15CT                                                                 | (GA)3GC<br>GCGTG                    | 66  | 734  |
| Aona<br>DRB*W2910 | CA(GA)2CA(GA)2CT(GA)4CT | (GA)7AT((GA)4,5,4CT)(GA)3TA(GA)2CTGAAAGAC(GA)2CA(GA)3AACT(GA)3AACATA(GA)2CT(GA)5CACA   | (GA)5CA<br>GAGC<br>(GA)4<br>GCG     | 114 | 1833 |
| Aona<br>DRB*W2908 | CA(GA)2CA(GA)2CT(GA)4CT | (GA)7AT((GA)4,5,4CT)(GA)3TA(GA)2CTGAAAGAC(GA)2CA(GA)3AACT(GA)3AACATA(GA)2CT(GA)5CACA   | (GA)5CA<br>GAGC<br>(GA)4<br>GCG     | 114 | 1833 |
| Aovo<br>DRB*W2901 | CA(GA)2CA(GA)2CT(GA)4CT | (GA)7ATGAAA((GA)2,5,4CT)(GA)3TA(GA)2CTGAAAGAC(GA)2CA(GA)4CT(GA)3AACATA(GA)2CT(GA)5CACA | (GA)5CA<br>GAGC<br>(GA)4<br>GCG     | 112 | 1854 |
| Aovo<br>DRB*W9001 | CA(GA)2CA(GA)2CT(GA)4CT | (GA)4AT((GA)4,4CT)(GA)3TA(GA)2CT(GA)3CAGACACA                                          | (GA)5CA<br>GAGC<br>(GA)4<br>GCG     | 74  | 1182 |
| Aovo<br>DRB*W8801 | CA(GA)4CA(GA)7CT(GA)7CT | (GA)7CT(GA)4AT((GA)4,5,4,6CT)(GA)6CTGAAAGAC(GA)2CA(GA)4CT(GA)3AACA(GA)3CT(GA)3GGGACACA | (GA)5CA<br>GAGC<br>(GA)4<br>GCG     | 156 | 1975 |
| Aovo<br>DRB*W8501 | CA(GA)2CA(GA)3CC(GA)5CT | (GA)6CTGAAAGAC(GA)2CA(GA)4CT(GA)3GGGACACA                                              | (GA)5CA<br>GAGC<br>(GA)4<br>GCG     | 68  | 1244 |
| Aovo<br>DRB*W8502 | CA(GA)2CA(GA)3CC        | (GA)3GCGACT((GA)4,6CT)(GA)6CTGAAAGAC(GA)2CA(GA)4CT(GA)3GGGACACA                        | (GA)5CA<br>GAGC<br>(GA)4<br>GCG     | 84  | 1477 |
| Aona<br>DRB*W8501 | CA(GA)2CA(GA)3CC        | ((GA)5,4CT)GC((GA)5,6CT)GAAAGAC(GA)2CA(GA)4CT(GA)3GGGACACACACA                         | (GA)5CA<br>GAGC<br>(GA)4<br>GCG     | 90  | 1443 |
| Aovo<br>DRB*W8601 | CA(GA)2CA(GA)2CA        | (GA)10AA(GA)7AGACA(GA)14G((GA)2,4CA)((GA)3,3CT)(GA)2AAGACA(GA)3GCCA                    | (GA)2GC<br>CAGAG<br>CCA(GA)<br>3GCA | 114 | 1528 |
| Aovo<br>DRB*W8602 | CA(GA)2CA(GA)2CA        | (GA)9AA(GA)7AGACA(GA)15G((GA)2,4CA)(GA)3CT(GA)2AAGACA(GA)3GCCA                         | (GA)2GC<br>CAGAG<br>CCA(GA)<br>2GCA | 106 | 1513 |

|                   |                             |                                                                                                                                                                                                                                                                                                                                                                                                                                                                                                                                                                                                                                         |                                                                       |     |      |
|-------------------|-----------------------------|-----------------------------------------------------------------------------------------------------------------------------------------------------------------------------------------------------------------------------------------------------------------------------------------------------------------------------------------------------------------------------------------------------------------------------------------------------------------------------------------------------------------------------------------------------------------------------------------------------------------------------------------|-----------------------------------------------------------------------|-----|------|
| Aovo<br>DRB*W3001 | CA(GA)2CA(GA)2CA            | (GA)10AA(GA)7AGACA(GA)15G((GA)2,4CA)((GA)3,3CT)(GA)2AAGACA(GA)3GCCA                                                                                                                                                                                                                                                                                                                                                                                                                                                                                                                                                                     | (GA)2GC<br>CAGAG<br>CCA(GA)<br>3GCA                                   | 116 | 1527 |
| Aona<br>DRB*W3002 | CA(GA)2CA(GA)2CA(GA)9A<br>A | (GA)11AA(GA)7AGACA(GA)9GTG((GA)2,4CA)(GA)3GCCA(GA)3CT(GA)2AAGACA                                                                                                                                                                                                                                                                                                                                                                                                                                                                                                                                                                        | (GA)2GC<br>CAGAG<br>CCA(GA)<br>3GCA                                   | 118 | 1623 |
| Caja-<br>DRB03    | CA(GA)3CA(GA)2TACA          | (GA)4CT(GA)3GG(GA)2CA(GA)2CT(GA)4CA(GA)9CA(GA)2TACA(GA)4CT(GA)4CA(GA)2GC(GA)2GCCA(GA)3AA                                                                                                                                                                                                                                                                                                                                                                                                                                                                                                                                                | (GA)3G<br>GAAA(<br>GA)30G<br>GGCG                                     | 158 |      |
| Caja-<br>DRB06    | CA(GA)3CA(GA)2TACA          | (GA)4CT(GA)4CA(GA)2GC(GA)2GC(GA)2GC(GA)2GCCA                                                                                                                                                                                                                                                                                                                                                                                                                                                                                                                                                                                            | (GA)7G<br>GAAA(<br>GA)37G<br>GGCG                                     | 130 |      |
| Caja-DRB02        | CA(GA)11CA(GA)9CA           | (GA)10TTGACA(GA)2CA(GA)3CT(GA)3CGAGGCAAAGACT(GA)2CAGACGAGAAG(GA)4CA(GA)2TT(GA)3AAGACT(GA)3CA(GA)4CT(GA)2AACT(GA)4CA(GA)2CT(GA)2CACT(GA)3CT(GA)3CC(GA)4C(GA)2CA(GA)4TA(GA)2AAGACA(GA)4CT(GA)3CA(GA)2CAGACT(GA)4CT(GA)2CT(GA)4CTTA(GA)2CT(GA)3CTGAAAAGACT(GA)5CT(GA)3CACT(GA)4CT(GA)2GC(GA)2CA(GA)3CT(GA)5CCGAGG(GA)2CT(GA)2CAGAACT(GA)3CT(GA)2AAGACT(GA)3CTAA(GA)2TACT(GA)5CT(GA)2CACTGATA(GA)2CT(GA)4CA(GA)2CT(GA)4TA(GA)4CTGAGCGACTAA(GA)2CACT(GA)3CT(GA)2CACTCATA(GA)2CT(GA)3CT(GA)2GGGACT(GA)3CTGACAGACACTGATA(GA)2CTCA(GA)4CT(GA)3CACT(GA)4CT                                                                                       | (GA)2G<br>CCAGA<br>GTGAC<br>ACT(GA)<br>16GGC                          | 434 |      |
| Caja-DRB05        | CA(GA)34CA(GA)13TTGACA      | (GA)2CT(GA)3CT(GA)3CGAGGCAAAGACT(GA)2CAGAC(GA)2AG(GA)4CA(GA)2TT(GA)3AAGACT(GA)3CA(GA)4CT(GA)2AACT(GA)4CA(GA)2CT(GA)2CACT(GA)3CT(GA)3CTGAAAAGTAAGACT(GA)5CT(GA)2GT(GA)2CA(GA)3CA(GA)3GCCT(GA)3CAGACA(GA)2CA(GA)4CT(GA)2CT(GA)5TT(GA)4CT(GA)3CACT(GA)7CT(GA)3CC(GA)4C(GA)2CA(GA)3GATAAAGACA(GA)4CT(GA)3CA(GA)2CAGACT(GA)4CT(GA)2CT(GA)4CTTA(GA)2CT(GA)3CTGAAAAGACT(GA)3CACT(GA)4CT(GA)2GC(GA)2CA(GA)3CT(GA)5CCGAGG(GA)2CT(GA)2CAGAACT(GA)3CT(GA)4CT(GA)3CTAA(GA)2TACT(GA)5CT(GA)2CACTGATA(GA)2CT(GA)4CA(GA)2CT(GA)4TA(GA)4CT(GA)3CTAA(GA)2CACT(GA)3CT(GA)2CACTCATA(GA)2CT(GA)2GGGACT(GA)3CTGACAGACACTGATA(GA)2CTCA(GA)4CT(GA)3CACT(GA)4CT | (GA)2G<br>CCAGA<br>GTGAC<br>ACT(GA)<br>15(GCG<br>A)2GCG<br>CAAGC<br>G | 554 |      |
| Caja-DRB01        | (GA)16CA(GA)9CT(GACA)2CT    | (GA)5CT(GA)3GTCTCA(GA)2CT(GA)4CA(GA)2CT(GA)3CTGT(GA)5CT(GA)4C(GA)2GG(GA)2(CAGA)2(GA)2AAGACT(GA)2CT(GA)5CT(GA)4CTGAAAAGACT(GA)3CT(GA)3CAAGACA(GA)2CT(GA)4TAAGACAGACT(GA)4CTGATG(GA)4CT(GA)9GG                                                                                                                                                                                                                                                                                                                                                                                                                                            | (GA)2A<br>AGG(G<br>A)3GGG<br>CG                                       | 212 |      |







```

                280          *          300          *          320          *          340
Aona-DRB1*0328GB : AGCGGAgAGGTGAGcGCGGCGGGgCGGGCCCTCCCTGTGAgCTGCcgaTCAGAGA gaga ga
Aona-DRB1*0329GA : AGCGGAGAGGTGAGCGCGGCGGGCGGGCCCTCCCTGTGAGCTGCCGATCAGAGAGAGACTGAGAGAGA : 345
Aona-DRB1*031701GA : AGCGGAGAGGTGAGCGCGGCGGGCGGGCCCTCCCTGTGAGCTGCCGATCAGAGAGAGACTGAGAGAGA : 345
Aovo-DRB1*0304GA : AGCGGAGAGGTGAGCGCGGCGGGCGGGCCCTCCCTGTGAGCTGCCGATCAGAGAGAGACTGAGAGAGA : 345
Aovo-DRB1*0305GA : AGCGGAGAGGTGAGCGCGGCGGGCGGGCCCTCCCTGTGAGCTGCCGATCAGAGAGAGACTGAGAGAGA : 345
Aovo-DRB1*0306GA : AGCGGAGAGGTGAGCGCGGCGGGCGGGCCCTCCCTGTGAGCTGCCGATCAGAGAGAGACTGAGAGAGA : 345
Aovo-DRB1*0307GA : AGCGGAGAGGTGAGCGCGGCGGGCGGGCCCTCCCTGTGAGCTGCCGATCAGAGAGAGACTGAGAGAGA : 345
Aona-DRB3*0615 : AGCGGAGAGGTGAGCGCGGCGGGCGGGCCCTCCCTGTGAGCTGCCGATCAGAGAGAGACTGAGAGAGA : 345
Aona-DRB3*0627 : AGCGGAGAGGTGAGCGCGGCGGGCGGGCCCTCCCTGTGAGCTGCCGATCAGAGAGAGACTGAGAGAGA : 345
Aona-DRB3*062501 : AGCGGAGAGGTGAGCGCGGCGGGCGGGCCCTCCCTGTGAGCTGCCGATCAGAGAGAGACTGAGAGAGA : 345
Aona-DRB3*0626 : AGCGGAGAGGTGAGCGCGGCGGGCGGGCCCTCCCTGTGAGCTGCCGATCAGAGAGAGACTGAGAGAGA : 345
Aona-DRB3*062502 : AGCGGAGAGGTGAGCGCGGCGGGCGGGCCCTCCCTGTGAGCTGCCGATCAGAGAGAGACTGAGAGAGA : 345
Aona-DRB3*0628 : AGCGGAGAGGTGAGCGCGGCGGGCGGGCCCTCCCTGTGAGCTGCCGATCAGAGAGAGACTGAGAGAGA : 345
Aovo-DRB3*0601 : AGCGGAGAGGTGAGCGCGGCGGGCGGGCCCTCCCTGTGAGCTGCCGATCAGAGAGAGACTGAGAGAGA : 345
Aona-DRB*W8901 : AGCGGAGAGGTGAGCGCGGCGGGCGGGCCCTCCCTGTGAGCTGCCGATCAGAGA----CAGAGACTGA : 341
Aona-DRB*W1808 : AGCGGAGAGGTGAGTGCGGCGGGCGGGCCCTCCCTGTGAGCTGCCGATCAGAGA----GAGAGACTGA : 341
Aona-DRB*W1806 : AGCGGAGAGGTGAGTGCGGCGGGCGGGCCCTCCCTGTGAGCTGCCGATCAGAGA----GAGAGACTGA : 341
Aovo-DRB*W1801 : AGCGGAAGGTGAGTGCGGCGGGCGGGCCCTCCCTGTGAGCTGCCGATCAGAGA----GAGAGA---- : 337
Aovo-DRB*W1802 : AGCGGAAGGTGAGTGCGGCGGGCGGGCCCTCCCTGTGAGCTGCCGATCAGAGA----GAGAGACTGA : 341
Aovo-DRB*W1803 : AGCGGAAGGTGAGTGCGGCGGGCGGGCCCTCCCTGTGAGCTGCCGATCAGAGA----GAGAGACTGA : 341
Aovo-DRB*W8801 : AGCGGAGAGGTGAGCGCGGCGGGCGGGCCCTCCCTGTGAGCTGCCGATCAGAGAGAGACTGAGAGAGA : 345
Aovo-DRB*W2901 : AGCGGAGAGGTGAGCGCGGCGGGCGGGCCCTCCCTGTGAGCTGCCGATCAGAGA----CAGAGACTGA : 341
Aona-DRB*W2908 : AGCGGAGAGGTGAGCGCGGCGGGCGGGCCCTCCCTGTGAGCTGCCGATCAGAGA----CAGAGACTGA : 341
Aona-DRB*W2910 : AGCGGAGAGGTGAGCGCGGCGGGCGGGCCCTCCCTGTGAGCTGCCGATCAGAGA----CAGAGACTGA : 341
Aovo-DRB*W3001 : AGCGGAGAGGTGAGCGCGGCGGGCGGGCCCTCCCTGTGAGCTGCCGATCAGAGA----CAGAGACTGA : 341
Aona-DRB*W3002 : AGCGGAGAGGTGAGCGCGGCGGGCGGGCCCTCCCTGTGAGCTGCCGATCAGAGA----CAGAGACTGA : 341
Aovo-DRB*W9201 : AGCGGAGAGGTGAGCGCGGCGGGCGGGCCCTCCCTGTGAGCTGCCGATCAGAGA----CAGAGACTGA : 341
Aovo-DRB*W9202 : AGCGGAGAGGTGAGCGCGGCGGGCGGGCCCTCCCTGTGAGCTGCCGATCAGAGA----CAGAGACTGA : 341
Aona-DRB*W9101 : AGCGGAGAGGTGAGCGCGGCGGGCGGGCCCTCCCTGTGAGCTGCCGATCAGAGA----CAGAGACTGA : 341
Aovo-DRB*W9101 : AGCGGAGAGGTGAGCGCGGCGGGCGGGCCCTCCCTGTGAGCTGCCGATCAGAGA----CAGAGACTGA : 341
Aovo-DRB*W9102 : AGCGGAGAGGTGAGCGCGGCGGGCGGGCCCTCCCTGTGAGCTGCCGATCAGAGA----CAGAGACTGA : 341
Aovo-DRB*W9001 : AGCGGAGAGGTGAGCGCGGCGGGCGGGCCCTCCCTGTGAGCTGCCGATCAGAGA----CAGAGACTGA : 341
Aovo-DRB*W4501 : AGCGGAGAGGTGAGCGCGGCGGGCGGGCCCTCCCTGTGAGCTGCCGATCAGAGA----CAGAGACTGA : 341
Aovo-DRB*W9301 : AGCGGAGAGGTGAGCGCGGCGGGCGGGCCCTCCCTGTGAGCTGCCGATCAGAGA----CAGAGACTGA : 341

```

```

                *          360          *          380          *          400          *
Aona-DRB1*0328GB : CTGAGAGAGAC-----CGAGAGAGAGACACAGAGACACTGAGAGA--GACAGAGAGAGAGAGACTGAG : 406
Aona-DRB1*0329GA : CTGAGAGAGACACTGAGTGAGAGTGTGAGACAGAGAGACAGAGAAAGACTGACAGACAGAGAGAGACTGAG : 414
Aona-DRB1*031701GA : CTGAGAGAGACACTGAGAGAGAGTGTGAGACAGAGAGACAGAGAAAGACTGACAGACAGAGAGAGACTGAG : 414
Aovo-DRB1*0304GA : CCGAGAGAGAG-----GACACAGAGACACTGAGAGA--GACAGAGAGAGAGAGACTGAG : 396
Aovo-DRB1*0305GA : CCGAGAGAGAG-----GACACAGAGACACTGAGAGA--GACAGAGAGAGAGAGACTGAG : 396
Aovo-DRB1*0306GA : CCGAGAGAGAG-----GACACAGAGACACTGAGAGA--GACAGAGAGAGAGAGACTGAG : 396
Aovo-DRB1*0307GA : CCGAGAGAGAG-----GAGAGACACAGAGACACTGAGAGA--GACAGAGAGAGAGAGACTGAG : 400
Aona-DRB3*0615 : CTGAGAGAGAC-----CGAGAGAGAGACACAGAGACACTGAGAGA--GACAGAGAGAGAGAGACTGAG : 406
Aona-DRB3*0627 : CTGAGAGAGAC-----CGAGAGAGAGACACAGAGACACTGAGAGA--GACAGAGAGAGAGAGACTGAG : 406
Aona-DRB3*062501 : CTGAGAGAGAC-----CGAGAGAGAGACACAGAGACACTGAGAGA--GACAGAGAGAGAGAGACTGAG : 406
Aona-DRB3*0626 : CTGAGAGAGAC-----CGAGAGAGAGACACAGAGACACTGAGAGA--GACAGAG--AGAGAGACTGAG : 404
Aona-DRB3*062502 : CCGAGAGAGAC-----CGAGAGAGAGACACAGAGACACTGAGAGA--GACAGAGAGAGAGAGACTGAG : 406
Aona-DRB3*0628 : CTGAGAGAGAC-----CGAGAGAGAGACACAGAGACACTGAGAGA--GACAGAGAGAGAGAGACTGAG : 406
Aovo-DRB3*0601 : CTGAGAGAGAC-----CGAGAGAGAGACACAGAGACACTGAGAGA--GACAGAG--GAGAGAGACTGAG : 405
Aona-DRB*W8901 : GA-----GAGACTGAGAGAGAGAG : 360
Aona-DRB*W1808 : GAGAGACTGAG-----AGAGAGAGAGAGA-----GAGACACAGAGAGAGAT : 382
Aona-DRB*W1806 : GAGAGACTGAG-----AGAGAGAGAGAGA-----GAGACACAGAGAGAGAT : 382
Aovo-DRB*W1801 : -----GAGACACAGAGAGAGAT : 354
Aovo-DRB*W1802 : GAGAGACTGAG-----AGAGAG-----AGA-----GAGAGAGAGAGAGACAC : 378
Aovo-DRB*W1803 : GAGAGAGAGAG-----AGAGAGAGAGAGA-----GAGACACAGAGAGAGAT : 382
Aovo-DRB*W8801 : GA-----GAGACTGAGAGAGAGAG : 364
Aovo-DRB*W2901 : GA-----GAGACTGAGAGAGAGAG : 360
Aona-DRB*W2908 : GA-----GAGACTGAGAGAGAGAG : 360
Aona-DRB*W2910 : GA-----GAGACTGAGAGAGAGAG : 360
Aovo-DRB*W3001 : GA-----GAGAGAGAGAGAGAGAA : 360
Aona-DRB*W3002 : GA-----GAGAGAGAGAGAGAAAG : 360
Aovo-DRB*W9201 : GA-----GAGAGAGAGAGAGAGAA : 360
Aovo-DRB*W9202 : GA-----GAGAGAGAGAGAGAAAG : 360
Aona-DRB*W9101 : -----CAGAGAGACCGAGAGAG : 348
Aovo-DRB*W9101 : -----CAGAGAGACCGAGAGAG : 348
Aovo-DRB*W9102 : -----CAGAGAGACCGAGAGAG : 348
Aovo-DRB*W9001 : -----CAGAGACTGAGAGAGAC : 348
Aovo-DRB*W4501 : GA-----GAGACTGAGAGAGAGAC : 360
Aovo-DRB*W9301 : -----GAGACTGAGAGAGAGAG : 348

```

|                    | 420 | *                          | 440                      | *                       | 460 | *   | 480 |  |
|--------------------|-----|----------------------------|--------------------------|-------------------------|-----|-----|-----|--|
|                    | aga |                            |                          |                         |     |     |     |  |
| Aona-DRB1*0328GB   | :   | AGA-GACAGTGA--GAGA-----    | -----                    | CTGAGAGACTGAGACTGAGAG   | :   | 442 |     |  |
| Aona-DRB1*0329GA   | :   | AGG-TACACTGA--GAGAGACAGAGT | GAGACAGAGAGACAGAGTAAGACT | GACAGAGAGAGACTGAGAG     | :   | 480 |     |  |
| Aona-DRB1*031701GA | :   | AGG-TACACTGA--GAGAGACAGAGT | GAGACAGAGAGACAGAGTAAGACT | GACAGAGAGAGACTGAGAG     | :   | 480 |     |  |
| Aovo-DRB1*0304GA   | :   | AGA-GACAGTGA--GAGACT-----  | -----                    | GAGAGACTGAGAGAGAC-----  | :   | 430 |     |  |
| Aovo-DRB1*0305GA   | :   | AGA-GACAGTGA--GAGA-----    | -----                    | CTGAGAGACTGAGACTGAGAG   | :   | 432 |     |  |
| Aovo-DRB1*0306GA   | :   | AGA-GACAGTGA--GAGACT-----  | -----                    | GAGAGACTGAGAGAGACTGAGAG | :   | 436 |     |  |
| Aovo-DRB1*0307GA   | :   | AGA-GACAGTGA--GAGACT-----  | -----                    | GAGAGACTGAGAGAGACTGAGAG | :   | 440 |     |  |
| Aona-DRB3*0615     | :   | AGA-GACAGTGA--GAGACT-----  | -----                    | GAGAGACTGAGAGAGACTGAGAG | :   | 446 |     |  |
| Aona-DRB3*0627     | :   | AGA-GACAGTGA--GAGACT-----  | -----                    | GAGAGACTGAGAGAGACTGAGAG | :   | 446 |     |  |
| Aona-DRB3*062501   | :   | AGA-GACAGTGA--GAGACT-----  | -----                    | GAGAGACTGAGAGAGACTGAGAG | :   | 446 |     |  |
| Aona-DRB3*0626     | :   | AGA-GACAGTGA--GAGACT-----  | -----                    | GAGAGACTGAGAGAGACTGAGAG | :   | 444 |     |  |
| Aona-DRB3*062502   | :   | AGA-GACAGTGA--GAGACT-----  | -----                    | GAGAGACTGAGAGAGACTGAGAG | :   | 446 |     |  |
| Aona-DRB3*0628     | :   | AGA-GACAGTGA--GAGACT-----  | -----                    | GAGAGACTGAGAGAGACTGAGAG | :   | 446 |     |  |
| Aovo-DRB3*0601     | :   | AGA-GACAGTGA--GAGACT-----  | -----                    | GAGAGACTGAGAGAGACTGAGAG | :   | 445 |     |  |
| Aona-DRB*W8901     | :   | AGA-----                   | -----                    |                         | :   | 363 |     |  |
| Aona-DRB*W1808     | :   | AGAC--AGAGACAGA--GAG-----  | -----                    |                         | :   | 398 |     |  |
| Aona-DRB*W1806     | :   | AGAC--AGAGACAGA--GAG-----  | -----                    |                         | :   | 398 |     |  |
| Aovo-DRB*W1801     | :   | AGAC--AGAGACAGA--GAG-----  | -----                    |                         | :   | 370 |     |  |
| Aovo-DRB*W1802     | :   | AGAG--AGAGATAGACAGAG-----  | -----                    |                         | :   | 396 |     |  |
| Aovo-DRB*W1803     | :   | AGAC--AGAGACAGA--GAG-----  | -----                    |                         | :   | 398 |     |  |
| Aovo-DRB*W8801     | :   | AGAC--TGAGAGAGAGAGAG-----  | -----                    |                         | :   | 382 |     |  |
| Aovo-DRB*W2901     | :   | AGA-----                   | -----                    |                         | :   | 363 |     |  |
| Aona-DRB*W2908     | :   | AGA-----                   | -----                    |                         | :   | 363 |     |  |
| Aona-DRB*W2910     | :   | AGA-----                   | -----                    |                         | :   | 363 |     |  |
| Aovo-DRB*W3001     | :   | AGA-----                   | -----                    |                         | :   | 363 |     |  |
| Aona-DRB*W3002     | :   | AGA-----                   | -----                    |                         | :   | 363 |     |  |
| Aovo-DRB*W9201     | :   | AGA-----                   | -----                    |                         | :   | 363 |     |  |
| Aovo-DRB*W9202     | :   | AGA-----                   | -----                    |                         | :   | 363 |     |  |
| Aona-DRB*W9101     | :   | AGA-----                   | -----                    |                         | :   | 351 |     |  |
| Aovo-DRB*W9101     | :   | A-----                     | -----                    |                         | :   | 349 |     |  |
| Aovo-DRB*W9102     | :   | CGA-----                   | -----                    |                         | :   | 351 |     |  |
| Aovo-DRB*W9001     | :   | TGA-----                   | -----                    |                         | :   | 351 |     |  |
| Aovo-DRB*W4501     | :   | TGA-----                   | -----                    |                         | :   | 363 |     |  |
| Aovo-DRB*W9301     | :   | ACT-----                   | -----                    |                         | :   | 351 |     |  |

|                    | *        | 500       | *                              | 520                                      | *                      | 540 | *   |  |
|--------------------|----------|-----------|--------------------------------|------------------------------------------|------------------------|-----|-----|--|
|                    | gagaga a |           |                                |                                          |                        |     |     |  |
| Aona-DRB1*0328GB   | :        | AGAC----- | ACTGAGAGAGACAGAGT---           | GAGACAGAGAGACA--                         | GAGAAAGGCTGACAGACAGAGA | :   | 499 |  |
| Aona-DRB1*0329GA   | :        | ATAC----- | ACTGAGAGAGACAGAGACT            | GAGAGACAGAGAGACTGAGAGAGACAGAGAGACTGAAA   | :                      | 543 |     |  |
| Aona-DRB1*031701GA | :        | ATAC----- | ACTGAGAGAGACAGAGACT            | GAGAGACAGCGAGACACTGAGAGAGACAGAGAGACTGAAA | :                      | 543 |     |  |
| Aovo-DRB1*0304GA   | :        | -----     | ACTGAGAGAGACAGAGT---           | GAGACAGAGAAACA--                         | GAGAAAGAC-----         | :   | 470 |  |
| Aovo-DRB1*0305GA   | :        | AGAC----- | ACTGAGAGAGACAGAGG---           | GAGACAGAGAGACA--                         | GAGAAAGACTGAGAGACAGAGA | :   | 489 |  |
| Aovo-DRB1*0306GA   | :        | AGAC----- | ACTGAGAGAGACAGAGT---           | GAGACAGAGAAACA--                         | GAGAAAGAC-----         | :   | 480 |  |
| Aovo-DRB1*0307GA   | :        | AGAC----- | ACTGAGAGAGACAGAGT---           | GAGACAGAGAAACA--                         | GAGAAAGAC-----         | :   | 484 |  |
| Aona-DRB3*0615     | :        | AGAC----- | ACTGAGAGAGACAGAGT---           | GAGACAGAGAAACA--                         | GAGAAAGAC-----         | :   | 490 |  |
| Aona-DRB3*0627     | :        | AGAC----- | ACTGAGAGAGACAGAGG---           | GAGACAGAGAGACA--                         | GAGAAAGACTGAGAGACAGAGA | :   | 503 |  |
| Aona-DRB3*062501   | :        | AGAC----- | ACTGAGAGAGACAGAGT---           | GAGACAGAGAAACA--                         | GAGAAAGAC-----         | :   | 490 |  |
| Aona-DRB3*0626     | :        | AGAC----- | ACTGAGAGAGACAGAGT---           | GAGACAGAGAAACA--                         | GAGAAAGAC-----         | :   | 488 |  |
| Aona-DRB3*062502   | :        | AGAC----- | ACTGAGAGAGACAGAGT---           | GAGACAGAGAAACA--                         | GAGAAAGAC-----         | :   | 490 |  |
| Aona-DRB3*0628     | :        | AGAC----- | ACTGAGAGAGACAGAGG---           | GAGACAGAGAGACA--                         | GAGAAAGACTGAGAGACAG--- | :   | 500 |  |
| Aovo-DRB3*0601     | :        | AGAC----- | ACTGAGAGAGACAGAGT---           | GAGACAGAGAAACA--                         | GAGAAAGAC-----         | :   | 489 |  |
| Aona-DRB*W8901     | :        | -----     | ATGAGAGAGACTGA-----            |                                          |                        | :   | 377 |  |
| Aona-DRB*W1808     | :        | --        | ACTGAGAGACTGTGAGAGAGACTGA----- |                                          |                        | :   | 423 |  |
| Aona-DRB*W1806     | :        | --        | ACTGAGAGACTGTGAGAGAGACTG-----  |                                          |                        | :   | 422 |  |
| Aovo-DRB*W1801     | :        | --        | ACTGAGAGACTGTGAGAGAGACTGA----- |                                          |                        | :   | 395 |  |
| Aovo-DRB*W1802     | :        | --        | ACTGAGAGACTGTGAGAGAGACTG-----  |                                          |                        | :   | 420 |  |
| Aovo-DRB*W1803     | :        | --        | ACTGAGAGACTGTGAGAGAGACTG-----  |                                          |                        | :   | 422 |  |
| Aovo-DRB*W8801     | :        | --        | ACTGAGAGAGAATGAGAGAGACTGA----- |                                          |                        | :   | 407 |  |
| Aovo-DRB*W2901     | :        | -----     | ATGAAAGAGACTGA-----            |                                          |                        | :   | 377 |  |
| Aona-DRB*W2908     | :        | -----     | ATGAGAGAGACTGA-----            |                                          |                        | :   | 377 |  |
| Aona-DRB*W2910     | :        | -----     | ATGAGAGAGACTGA-----            |                                          |                        | :   | 377 |  |
| Aovo-DRB*W3001     | :        | -----     | GAGAGAGAGAG-----               |                                          |                        | :   | 374 |  |
| Aona-DRB*W3002     | :        | -----     | GAGAGAGAGAG-----               |                                          |                        | :   | 374 |  |
| Aovo-DRB*W9201     | :        | -----     | GAGAGAGAGAG-----               |                                          |                        | :   | 374 |  |
| Aovo-DRB*W9202     | :        | -----     | GAGAGAGAGAA-----               |                                          |                        | :   | 374 |  |
| Aona-DRB*W9101     | :        | -----     | CTGAGAGAGACTGC-----            |                                          |                        | :   | 365 |  |
| Aovo-DRB*W9101     | :        | -----     |                                |                                          |                        | :   | -   |  |
| Aovo-DRB*W9102     | :        | -----     | CTGAGAGAGACTGA-----            |                                          |                        | :   | 365 |  |
| Aovo-DRB*W9001     | :        | -----     | GAGA-----                      |                                          |                        | :   | 355 |  |
| Aovo-DRB*W4501     | :        | -----     | GAGAGAGAGTG-----               |                                          |                        | :   | 374 |  |
| Aovo-DRB*W9301     | :        | -----     | GAGAG-----                     |                                          |                        | :   | 356 |  |





|                    |     |                                                                        |     |     |     |   |    |
|--------------------|-----|------------------------------------------------------------------------|-----|-----|-----|---|----|
|                    | 700 | *                                                                      | 720 | *   | 740 | * | 76 |
| Aona-DRB1*0328GB   | :   | CACTGAGAGAGACAGAGA--GACTGAAAGACTGAGAGATACTTAGGGAGACTGAGAGAAAC-----A    | :   | 667 |     |   |    |
| Aona-DRB1*0329GA   | :   | GACTGAGGGAGACAGAGAATGAGAGAGAGACTGAGAGACAAG-ACAGAGACTGAGAGAGATGAGACAGA  | :   | 747 |     |   |    |
| Aona-DRB1*031701GA | :   | GACTGAGGGAGACCAGAGAATGAGAGAGAGACTGAGAGACAAG-ACAGAGACTGAGAGAGATGAGACAGA | :   | 747 |     |   |    |
| Aovo-DRB1*0304GA   | :   | -----                                                                  | :   | -   |     |   |    |
| Aovo-DRB1*0305GA   | :   | GACT-----                                                              | :   | 597 |     |   |    |
| Aovo-DRB1*0306GA   | :   | -----                                                                  | :   | -   |     |   |    |
| Aovo-DRB1*0307GA   | :   | -----                                                                  | :   | -   |     |   |    |
| Aona-DRB3*0615     | :   | -----                                                                  | :   | -   |     |   |    |
| Aona-DRB3*0627     | :   | GGCT-----                                                              | :   | 613 |     |   |    |
| Aona-DRB3*062501   | :   | -----                                                                  | :   | -   |     |   |    |
| Aona-DRB3*0626     | :   | -----                                                                  | :   | -   |     |   |    |
| Aona-DRB3*062502   | :   | -----                                                                  | :   | -   |     |   |    |
| Aona-DRB3*0628     | :   | GACT-----                                                              | :   | 609 |     |   |    |
| Aovo-DRB3*0601     | :   | -----                                                                  | :   | -   |     |   |    |
| Aona-DRB*W8901     | :   | -----                                                                  | :   | -   |     |   |    |
| Aona-DRB*W1808     | :   | -----                                                                  | :   | -   |     |   |    |
| Aona-DRB*W1806     | :   | -----                                                                  | :   | -   |     |   |    |
| Aovo-DRB*W1801     | :   | -----                                                                  | :   | -   |     |   |    |
| Aovo-DRB*W1802     | :   | -----                                                                  | :   | -   |     |   |    |
| Aovo-DRB*W1803     | :   | -----                                                                  | :   | -   |     |   |    |
| Aovo-DRB*W8801     | :   | -----                                                                  | :   | -   |     |   |    |
| Aovo-DRB*W2901     | :   | -----                                                                  | :   | -   |     |   |    |
| Aona-DRB*W2908     | :   | -----                                                                  | :   | -   |     |   |    |
| Aona-DRB*W2910     | :   | -----                                                                  | :   | -   |     |   |    |
| Aovo-DRB*W3001     | :   | -----                                                                  | :   | -   |     |   |    |
| Aona-DRB*W3002     | :   | -----                                                                  | :   | -   |     |   |    |
| Aovo-DRB*W9201     | :   | -----                                                                  | :   | -   |     |   |    |
| Aovo-DRB*W9202     | :   | -----                                                                  | :   | -   |     |   |    |
| Aona-DRB*W9101     | :   | -----                                                                  | :   | -   |     |   |    |
| Aovo-DRB*W9101     | :   | -----                                                                  | :   | -   |     |   |    |
| Aovo-DRB*W9102     | :   | -----                                                                  | :   | -   |     |   |    |
| Aovo-DRB*W9001     | :   | -----                                                                  | :   | -   |     |   |    |
| Aovo-DRB*W4501     | :   | -----                                                                  | :   | -   |     |   |    |
| Aovo-DRB*W9301     | :   | -----                                                                  | :   | -   |     |   |    |

|                    |   |                                                                         |     |     |     |   |     |
|--------------------|---|-------------------------------------------------------------------------|-----|-----|-----|---|-----|
|                    | 0 | *                                                                       | 780 | *   | 800 | * | 820 |
| Aona-DRB1*0328GB   | : | GAGAGACTGAGAGAGACTGAGAGAAAAGACTGAGAGAGAGACTGAGAGAGGCTGAGAGACTGAGGGGAGA- | :   | 735 |     |   |     |
| Aona-DRB1*0329GA   | : | GAGAGACTGAGAGAGACTAAGAGA--GACTGAGGGGAGA--CTGAGAGAGACTGAAAGACTGAGAGAGAG  | :   | 812 |     |   |     |
| Aona-DRB1*031701GA | : | GAGAGACTGAGAGAGACTAAGAGA--GACTGAGGGGAGA--CTGAGAGAGACTGAAAGACTGAGAGAGAG  | :   | 812 |     |   |     |
| Aovo-DRB1*0304GA   | : | -----GA-----CTGAGAGAGACTGAGAGACTGAGAGAAA-                               | :   | 599 |     |   |     |
| Aovo-DRB1*0305GA   | : | -----GAGAGACTGAGAGA--TACTTAGGGGAGA--CTGAGAGAGACAGAGAGACTGAGAGAGA-       | :   | 651 |     |   |     |
| Aovo-DRB1*0306GA   | : | -----GA-----CTGAGAGAGACTGAGAGACTGAGAGAAA-                               | :   | 609 |     |   |     |
| Aovo-DRB1*0307GA   | : | -----GA-----CTGAGAGAGACTGAGAGACTGAGAGAAA-                               | :   | 613 |     |   |     |
| Aona-DRB3*0615     | : | -----CTGAGAGA-----AAGA--CTGAGAGAGACTGAGAGACTGAGAGAAA-                   | :   | 627 |     |   |     |
| Aona-DRB3*0627     | : | -----GAGAGACTGAGAGA--TACTTAGGGGAGA--CTGAGAGAGACAGAGAGACTGAGAGAAAAG      | :   | 668 |     |   |     |
| Aona-DRB3*062501   | : | -----CTGAGAGA-----AAGA--CTGAGAGAGACTGAGAGACTGAGAGAAA-                   | :   | 627 |     |   |     |
| Aona-DRB3*0626     | : | -----CTGAGAGA-----AAGA--CTGAGAGAGACTGAGAGACTGAGAGAAA-                   | :   | 625 |     |   |     |
| Aona-DRB3*062502   | : | -----CTGAAAGA-----CTGAGAGAGACTGAGAGACTGAGAGAAA-                         | :   | 623 |     |   |     |
| Aona-DRB3*0628     | : | -----GAGAGACTGAGAGA--TACTTAGGGGAGA--CTGAGAGAGACAGAGAGACTGAGAGAAAAG      | :   | 664 |     |   |     |
| Aovo-DRB3*0601     | : | -----CTGAGAGA-----AAGA--CTGAGAGAGACTGAGAGACTGAGAGAAA-                   | :   | 626 |     |   |     |
| Aona-DRB*W8901     | : | -----AAGAC-                                                             | :   | 418 |     |   |     |
| Aona-DRB*W1808     | : | -----GACTGAGA--                                                         | :   | 487 |     |   |     |
| Aona-DRB*W1806     | : | -----GACTGAGA--                                                         | :   | 477 |     |   |     |
| Aovo-DRB*W1801     | : | -----GACTGAGA--                                                         | :   | 459 |     |   |     |
| Aovo-DRB*W1802     | : | -----GACTGAGA--                                                         | :   | 475 |     |   |     |
| Aovo-DRB*W1803     | : | -----GACTGAGA--                                                         | :   | 463 |     |   |     |
| Aovo-DRB*W8801     | : | -----CTGAAAGAC-                                                         | :   | 462 |     |   |     |
| Aovo-DRB*W2901     | : | -----AAGAC-                                                             | :   | 418 |     |   |     |
| Aona-DRB*W2908     | : | -----AAGAC-                                                             | :   | 418 |     |   |     |
| Aona-DRB*W2910     | : | -----AAGAC-                                                             | :   | 418 |     |   |     |
| Aovo-DRB*W3001     | : | -----GAGAG-                                                             | :   | 411 |     |   |     |
| Aona-DRB*W3002     | : | -----GAG--                                                              | :   | 413 |     |   |     |
| Aovo-DRB*W9201     | : | -----GAG--                                                              | :   | 409 |     |   |     |
| Aovo-DRB*W9202     | : | -----GAG--                                                              | :   | 409 |     |   |     |
| Aona-DRB*W9101     | : | -----                                                                   | :   | -   |     |   |     |
| Aovo-DRB*W9101     | : | -----                                                                   | :   | -   |     |   |     |
| Aovo-DRB*W9102     | : | -----                                                                   | :   | -   |     |   |     |
| Aovo-DRB*W9001     | : | -----                                                                   | :   | -   |     |   |     |
| Aovo-DRB*W4501     | : | -----                                                                   | :   | -   |     |   |     |
| Aovo-DRB*W9301     | : | -----                                                                   | :   | -   |     |   |     |

```

*      840      *      860      *      880      *
Aona-DRB1*0328GB : -----CAGAGAATGAGAGAGA--GACTGAGAGA---TAAGACAGAGACTGAGAGAGA : 782
Aona-DRB1*0329GA : ACTGAGAGAGACAAGACAGAGACTGAGAGAGATGAGACAGAGAGAGACTGAGAGAAAGACTGAGAGACA : 881
Aona-DRB1*031701GA : ACTGAGAGAGACAAGACAGAGACTGAGAGAGATGAGACAGAGAGAGACTGAGAGAAAGACTGAGAGACA : 881
Aovo-DRB1*0304GA : ----- : -
Aovo-DRB1*0305GA : -----CTGAGAGAAAGACTGAGAGAGA-- : 671
Aovo-DRB1*0306GA : ----- : -
Aovo-DRB1*0307GA : ----- : -
Aona-DRB3*0615 : ----- : -
Aona-DRB3*0627 : ACT-----GAGAGAGACTGAGAGACT : 689
Aona-DRB3*062501 : ----- : -
Aona-DRB3*0626 : ----- : -
Aona-DRB3*062502 : ----- : -
Aona-DRB3*0628 : ACT-----GAGAGAGACTGAGAGACT : 685
Aovo-DRB3*0601 : ----- : -
Aona-DRB*W8901 : ----- : -
Aona-DRB*W1808 : ----- : -
Aona-DRB*W1806 : ----- : -
Aovo-DRB*W1801 : ----- : -
Aovo-DRB*W1802 : ----- : -
Aovo-DRB*W1803 : ----- : -
Aovo-DRB*W8801 : ----- : -
Aovo-DRB*W2901 : ----- : -
Aona-DRB*W2908 : ----- : -
Aona-DRB*W2910 : ----- : -
Aovo-DRB*W3001 : ----- : -
Aona-DRB*W3002 : ----- : -
Aovo-DRB*W9201 : ----- : -
Aovo-DRB*W9202 : ----- : -
Aona-DRB*W9101 : ----- : -
Aovo-DRB*W9101 : ----- : -
Aovo-DRB*W9102 : ----- : -
Aovo-DRB*W9001 : ----- : -
Aovo-DRB*W4501 : ----- : -
Aovo-DRB*W9301 : ----- : -

```

```

900      *      920      *      940      *      960
ga ag g agagac
Aona-DRB1*0328GB : T-GAGACAGAGAGA---GACTGA--GAGAAAGACTGAGAGACAGAGA---CTGAGAGACTGAGAGAGA- : 839
Aona-DRB1*0329GA : --GAGACTGAGAGACTGAGACTGAGAGAAAATAGACTGAGAGACTGAGAGACACTGAGAGACTGAGAGAC : 948
Aona-DRB1*031701GA : --GAGACTGAGAGACTGAGACTGAGAGAAAATAGACTGAGAGACTGAGAGACACTGAGAGACTGAGAGAC : 948
Aovo-DRB1*0304GA : -----CAGAGA-----CTGAGAGACTGAGAGACACTGAGAGACTGAGAGAC : 640
Aovo-DRB1*0305GA : -----GACTGAGAGAGA-----AACAGGGACTGAGAGACTGAGAGACACTGAGAGACTGAGAGAC : 724
Aovo-DRB1*0306GA : -----CAGAGA-----CTGAGAGACTGAGAGACACTGAGAGACTGAGAGAC : 650
Aovo-DRB1*0307GA : -----CAGAGA-----CTGAGAGACTGAGAGACACTGAGAGACTGAGAGAC : 654
Aona-DRB3*0615 : -----CAGAGA-----CTGAGAGACTGAGAGACACTGAGAGACTGAGAGAC : 668
Aona-DRB3*0627 : GAGAGACTGAGAGAGA-----AACAGAGACTGAGAGACTGAGAGACACTGAGAGACTGAGAGAC : 746
Aona-DRB3*062501 : -----CAGAGA-----CTGAGAGACTGAGAGACACTGAGAGACTGAGAGAC : 668
Aona-DRB3*0626 : -----CAGAGA-----CTGAGAGACTGAGAGACACTGAGAGACTGAGAGAC : 666
Aona-DRB3*062502 : -----CAGAGA-----CTGAGAGACTGAGAGACACTGAGAGACTGAGAGAC : 664
Aona-DRB3*0628 : GAGAGACTGAGAGAGA-----AACAGAGACTGAGAGACTGAGAGACACTGAGAGACTGAGAGAC : 742
Aovo-DRB3*0601 : -----CAGAGA-----CTGAGAGACTGAGAGACACTGAGAGACTGAGAGAC : 667
Aona-DRB*W8901 : -----GAGACAG-----AG-----AGAAAC : 433
Aona-DRB*W1808 : -----GAGGCTG-----AGAGACTCGGAGAGAC : 510
Aona-DRB*W1806 : -----GAGACTG-----AGAGACTCGGAGAGAC : 500
Aovo-DRB*W1801 : -----GAGACTG-----AGAGACTCGGAGAGAC : 482
Aovo-DRB*W1802 : -----GAGACTG-----AGAGACTCGGAGAGAC : 498
Aovo-DRB*W1803 : -----GAGACTG-----AGAGACTCGGAGAGAC : 486
Aovo-DRB*W8801 : -----GAGACAG-----AG-----AGAGAC : 477
Aovo-DRB*W2901 : -----GAGACAG-----AG-----AGAGAC : 433
Aona-DRB*W2908 : -----GAGACAG-----AG-----AGAAAC : 433
Aona-DRB*W2910 : -----GAGACAG-----AG-----AGAAAC : 433
Aovo-DRB*W3001 : -----GAGACAG-----AG-----AGAGAC : 426
Aona-DRB*W3002 : -----AGAGAG-----AGT-----GGAGAC : 428
Aovo-DRB*W9201 : -----GAGACAG-----AG-----AGAGAC : 424
Aovo-DRB*W9202 : -----GAGACAG-----AG-----AGAGAC : 424
Aona-DRB*W9101 : -----GACTGAG-----AGAGA----GAGACTG : 392
Aovo-DRB*W9101 : -----GACTGAG-----AGAGA----GAGACTG : 368
Aovo-DRB*W9102 : -----GACTGAG-----AGAGA----GAGACTG : 392
Aovo-DRB*W9001 : -----GAATGAG-----AGAGA----CTGAGAG : 374
Aovo-DRB*W4501 : -----AGACAG-----AG-----AGAGAC : 413
Aovo-DRB*W9301 : ----- : -

```

```

          *           980           *           1000           *           1020           *
          ag  aga  a                               ActGA agAga  agA  A
Aona-DRB1*0328GB : ---GACAGAGACTGAGAGACTGAGAGA---CTGAGAGACACAGATAGAGATTGAGAGACTGAGAGAGA : 901
Aona-DRB1*0329GA : ACAGATAGAGATTGAGAGACTGAGAGAGAGACTGAGAGACACTGATAGAGACTGAGAGAGAGACTGAGA : 1017
Aona-DRB1*031701GA : ACAGATAGAGATTGAGAGACTGAGAGAGAGACTGAGAGACACTGATAGAGACTGAGAGAGAGACTGAGA : 1017
Aovo-DRB1*0304GA : ACAGATAGAGATTGAGAGACTGAGAGA-----CACTGATAGAGACTGAGAGA--GACTGAGA : 695
Aovo-DRB1*0305GA : ACAGATAGAAATTGAGAGACTGAGAGA-----CACTGATAGAGACTGAGAGAGAGACTGAGA : 781
Aovo-DRB1*0306GA : ACAGATAGAGATTGAGAGACTGAGAGA-----CACTGATAGAGACTGAGAGA--GACTGAGA : 705
Aovo-DRB1*0307GA : ACAGATAGAGATTGAGAGACTGAGAGA-----CACTGATAGAGACTGAGAGA--GACTGAGA : 709
Aona-DRB3*0615 : ACAGATAGAGATTGAGAGACTGAGAGAGAGACTGAGAGACACTGATAGAGACTGAGAGAGAGACTGAGA : 737
Aona-DRB3*0627 : ACAGATAGAGATTGAGAGACTGAGAGA-----CACTGATAGAGACTGAGAGAGAGACTGAGA : 803
Aona-DRB3*062501 : ACAGATAGAGATTGAGAGACTGAGAGAGAGACTGAGAGACACTGATAGAGACTGAGAGAGAGACTGAGA : 737
Aona-DRB3*0626 : ACAGATAGAGATTGAGAGACTGAGAGAGAGACTGAGAGACACTGATAGAGACTGAGAGAGAGACTGAGA : 735
Aona-DRB3*062502 : ACAGATAGAGATTGAGAGACTGAGAGAGAGACTGAGAGACACTGATAGAGACTGAGAGAGAGA----- : 727
Aona-DRB3*0628 : ACAGATAGAGATTGAGAGACTGAGAGA-----CACTGATAGAGACTGAGAGAGAGACTGAGA : 799
Aovo-DRB3*0601 : ACAGATAGAGATTGAGAGACTGAGAGAGAGACTGAGAGACACTGATAGAGACTGAGAGAGAGACTGAGA : 736
Aona-DRB*W8901 : TGAG--AGAAACAT-----AGA--GACTGAGAGAGAG--ACACA----- : 466
Aona-DRB*W1808 : TGAGCGAGAGACTG-----AGATAGACTGAGAGAAACTGAGAGA----- : 549
Aona-DRB*W1806 : TGAGCGAGAGACTG-----AGATAGACTGAGAGAAACTGAGAGA----- : 539
Aovo-DRB*W1801 : TGAGCGAGAGACTG-----AGATAGACTGAGAGAAACTGAGAGA----- : 521
Aovo-DRB*W1802 : TGAGCGAGAGACTG-----AGATAGACTGAGAGAAAC--AGAGA----- : 535
Aovo-DRB*W1803 : TGAGCGAGAGACTG-----AGATAGACTGAGAGAAACTGAGAGA----- : 525
Aovo-DRB*W8801 : TGAG--AGAAACAG-----AGA--GACTGAGAGAGGG--ACACA----- : 510
Aovo-DRB*W2901 : TGAG--AGAAACAT-----AGA--GACTGAGAGAGAG--ACACA----- : 466
Aona-DRB*W2908 : TGAG--AGAAACAT-----AGA--GACTGAGAGAGAG--ACACA----- : 466
Aona-DRB*W2910 : TGAG--AGAAACAT-----AGA--GACTGAGAGAGAG--ACACA----- : 466
Aovo-DRB*W3001 : --AG--AGAGACTG-----AGA--GACTGAGAAAGAC--AGAGA----- : 457
Aona-DRB*W3002 : AGAG--AGAGACAG-----AGA--GACTGAGAAAGAC--AGAGA----- : 461
Aovo-DRB*W9201 : --AG--AGAGACTG-----AGA--GACTGAGAAAGAC--AGAGA----- : 455
Aovo-DRB*W9202 : --AG--AGAGACTG-----AGA--GACTGAGAAAGAC--AGAGA----- : 455
Aona-DRB*W9101 : AAAGACGAGACA-----GAGAGAGACTGAGAGAGGGACA----- : 426
Aovo-DRB*W9101 : AAAGACGAGACA-----GAGAGAGACTGAGAGAGGGACA----- : 402
Aovo-DRB*W9102 : AAAGACGAGACA-----GAGAGAGACTGAGAGAGGGACA----- : 426
Aovo-DRB*W9001 : AGACTGAGAGAT-----AGAGACTGAGAGACAGACA----- : 405
Aovo-DRB*W4501 : --AG--AGAGGCTG-----AGA--GACTGAGAAAGAC--AGAGA----- : 444
Aovo-DRB*W9301 : -----AGAGACTGAGAGAGAGAGAGAGA----- : 379

```

```

          1040           *           1060           *           1080           *           1100
          ag  agaGAGa  AgaG  ga                               GaGagaGc
Aona-DRB1*0328GB : GACTGGGGGGG--GAGAGAGAGAGAGAGAGAGAGA-----CTGAGAGAGCACGCTG : 949
Aona-DRB1*0329GA : GACTGAGAGAGAGAGAGAGAGAGAGAGAGAGAGAGAGAGAGAGAGAGAGA---CTGAGAGAGCGCTG : 1082
Aona-DRB1*031701GA : GACTGAGAGAGAGAGAGAGAGAGAGAGAGAGAGAGAGAGAGAGAGAGAGACTGAGAGAGCGCTG : 1086
Aovo-DRB1*0304GA : GACTGAGAGAGAGAGAGAGAGAGAGAAA-----CTGAGAGAGCACTTG : 738
Aovo-DRB1*0305GA : GACTGAGAGACAGAGAGAGAGAGAGAGAAA-----CTGAGAGAGCACTTG : 828
Aovo-DRB1*0306GA : GACTGAGAGAGAGAGAGAGAGAGAGAGAAA-----CTGAGAGAGCACTTG : 752
Aovo-DRB1*0307GA : GACTGAGAGAGAGAGAGAGAGAGAGAGAAA-----CTGAGAGAGCACTTG : 756
Aona-DRB3*0615 : GACTGAGAGAGAGAGAGAGAGAGAGAGAGAGA-----CTGAGAGAGCGCTTG : 786
Aona-DRB3*0627 : GACTGAGAGAGAGAGAGAGAGAGAGAAA-----CTGAGAGAGCACTTG : 844
Aona-DRB3*062501 : GACTGAGAGAGAGAGAGAGAGAGAGAGAGAGA-----CTGAGAGAGCGCTTG : 786
Aona-DRB3*0626 : GACTGAGAGAGAGAGAGAGAGAGAGAGAGAGA-----CTGAGAGAGCGCTTG : 784
Aona-DRB3*062502 : -----GAGAGAGAGAGAGAGAGAGA-----CTGAGAGAGCGCTTG : 764
Aona-DRB3*0628 : GACTGAGAGAGAGAGAGAGAGAGAGAGAAA-----CTGAGAGAGCACTTG : 842
Aovo-DRB3*0601 : GACTGAGAGAGAGAGAGAGAGAGAGAGAGAGA-----CTGAGAGAGCGCTTG : 785
Aona-DRB*W8901 : ----GAG--AGAGAGACAGAGCGA-----GAGAGAGCG---- : 493
Aona-DRB*W1808 : ----TACTGAGAGAGAGAGAGCGC-----CGCACAGCG---- : 578
Aona-DRB*W1806 : ----TACTGAGAGAGAGAGAGCGC-----CGCACAGCG---- : 568
Aovo-DRB*W1801 : ----TACTGAGAGAGAGAGAGCGC-----CGCACAGCG---- : 550
Aovo-DRB*W1802 : ----TACTGAGAGAGAGAGAGCGC-----CGCACAGCG---- : 564
Aovo-DRB*W1803 : ----TACTGAGAGAGAGAGAGCGC-----CGCACAGCG---- : 554
Aovo-DRB*W8801 : ----GAG--AGAGAGACAGAGCGA-----GAGAGAGCG---- : 537
Aovo-DRB*W2901 : ----GAG--AGAGAGACAGAGCGA-----GAGAGAGCG---- : 493
Aona-DRB*W2908 : ----GAG--AGAGAGACAGAGCGA-----GAGAGAGCG---- : 493
Aona-DRB*W2910 : ----GAG--AGAGAGACAGAGCGA-----GAGAGAGCG---- : 493
Aovo-DRB*W3001 : ----GAGCCAGAGAGCCAGAGCCA-----GAGAGAGCA---- : 486
Aona-DRB*W3002 : ----GAGCCAGAGAGCCAGAGCCA-----GAGAGAGCA---- : 490
Aovo-DRB*W9201 : ----GAGCCAGAGAGCCAGAGCCA-----GAGAGAGCA---- : 484
Aovo-DRB*W9202 : ----GAGCCAGAGAGCCAGAGCCA-----GAGAGAGCA---- : 484
Aona-DRB*W9101 : ----CAGAGAGAGAGACAGAGCGA-----GAGAGAGCG---- : 455
Aovo-DRB*W9101 : ----CAGAGAGAGAGACAGAGCGA-----GAGAGAGCG---- : 431
Aovo-DRB*W9102 : ----CAGAGAGAGAGACAGAGCGA-----GAGAGAGCG---- : 455
Aovo-DRB*W9001 : ----CAGAGAGAGAGACAGAGCGA-----GAGAGAGCG---- : 434
Aovo-DRB*W4501 : ----GAGCCAGAGAGCCAGAGCCA-----GAGAGAGCA---- : 473
Aovo-DRB*W9301 : ----GAGAGAGAGAGAGACTGAGA-----GAGCGGCTG---- : 408

```





```

*          1260          *          1280          *          1300          *
Aona-DRB1*0328GB : Ggcctct gtg gagg gaca gagg gg t cagggg tggaga ggaggagacct gattgtcc : 1152
Aona-DRB1*0329GA : GGCCTCT-GTGGGGAGGTGACACAGGAGGTGGGTGCAGGGG-TGGAGAGGGAGGAGACCTCGATTGTCC : 1285
Aona-DRB1*031701GA : GGCCTCT-GTGGGGAGGTGACACAGGAGGTGGGTGCAGGGG-TGGAGAGGGAGGAGACCTCGATTGTCC : 1289
Aovo-DRB1*0304GA : GGCCTCT-GTGGGGAGGTGACACAGGAGGTGGGTGCAGGGG-TGGAGAGGGAGGAGACCTCGATTGTCC : 941
Aovo-DRB1*0305GA : GGCCTCT-GTGGGGAGGTGACACAGGAGGTGGGTGCAGGGG-TGGAGAGGGAGGAGACCTCGATTGTCC : 1031
Aovo-DRB1*0306GA : GGCCTCT-GTGGGGAGGTGACACAGGAGGTGGGTGCAGGGG-TGGAGAGGGAGGAGACCTCGATTGTCC : 955
Aovo-DRB1*0307GA : GGCCTCT-GTGGGGAGGTGACACAGGAGGTGGGTGCAGGGG-TGGAGAGGGAGGAGACCTCGATTGTCC : 959
Aona-DRB3*0615 : GGCCTCT-GTGGGGAGGTGACACAGGAGGTGGGTGCAGGGG-TGGAGAGGGAGGAGACCTCGATTGTCC : 987
Aona-DRB3*0627 : GGCCTCT-GTGGGGAGGTGACACAGGAGGTGGGTGCAGGGG-TGGAGAGGGAGGAGACCTCGATTGTCC : 1047
Aona-DRB3*062501 : GGCCTCT-GTGGGGAGGTGACACAGGAGGTGGGTGCAGGGG-TGGAGAGGGAGGAGACCTCGATTGTCC : 987
Aona-DRB3*0626 : GGCCTCT-GTGGGGAGGTGACACAGGAGGTGGGTGCAGGGG-TGGAGAGGGAGGAGACCTCGATTGTCC : 985
Aona-DRB3*062502 : GGCCTCT-GTGGGGAGGTGACACAGGAGGTGGGTGCAGGGG-TGGAGAGGGAGGAGACCTCGATTGTCC : 965
Aona-DRB3*0628 : GGCCTCT-GTGGGGAGGTGACACAGGAGGTGGGTGCAGGGG-TGGAGAGGGAGGAGACCTCGATTGTCC : 1045
Aovo-DRB3*0601 : GGCCTCT-GTGGGGAGGTGACACAGGAGGTGGGTGCAGGGG-TGGAGAGGGAGGAGACCTCGATTGTCC : 986
Aona-DRB*W8901 : GGCCTCT-GTGAGGAGGTGACATGGGAGGCGGGTGCAGGGG-TGGAGAGGGAGGAGACCTCGATTGTCC : 695
Aona-DRB*W1808 : GGCCTCTGTGTGTTGAGGGGACATGTGAGGTGGCTGCAGGGGCTGGAGAGGGAGGAGACCTCGATTGTCC : 783
Aona-DRB*W1806 : GGCCTCTTGTGTTGAGGGGACATGTGAGGTGGCTGCAGGGGCTGGAGAGGGAGGAGACCTCGATTGTCC : 773
Aovo-DRB*W1801 : G----- : 689
Aovo-DRB*W1802 : GGCCTCTTGTGTTGAGGGGACATGTGAGGTGGCTGCAGGGGCTGGAGAGGGAGGAGACCTCGATTGTCC : 769
Aovo-DRB*W1803 : GGCCTCTTGTGTTGAGGGGACATGTGAGGTGGCTGCAGGGGCTGGAGAGGGAGGAGACCTCGATTGTCC : 759
Aovo-DRB*W8801 : GGCCTCT-GTGAGGAGGTGACATGGGAGGCGGGTGCAGGGG-TGGAGACGGAGGAGACCTGGATTGTCC : 740
Aovo-DRB*W2901 : GGCCTCT-GTGAGGAGGTGACATGGGAGGCGGGTGCAGGGG-TGGAGAGGGAGGAGACCTGGATTGTCC : 696
Aona-DRB*W2908 : GGCCTCT-GTGAGGAGGTGACATGGGAGGCGGGTGCAGGGG-TGGAGAGGGAGGAGACCTGGATTGTCC : 696
Aona-DRB*W2910 : GGCCTCT-GTGAGGAGGTGACATGGGAGGCGGGTGCAGGGG-TGGAGAGGGAGGAGACCTGGATTGTCC : 696
Aovo-DRB*W3001 : G----- : 623
Aona-DRB*W3002 : GGCCTCT-GTGGGGAGGTGACACAGGAGGTGGGTGCAGAGG-TGGGGAGGGAGGAGACCTCGTTGTCA : 693
Aovo-DRB*W9201 : G----- : 621
Aovo-DRB*W9202 : G----- : 621
Aona-DRB*W9101 : GGCCTCT-GTGAGGAGGTGACATGGGAGGCGGGTACAGGGG-TGGAGACGGAGGAGACCTGGATTGTCC : 658
Aovo-DRB*W9101 : GGCCTCT-GTGAGGAGGTGACATGGGAGGCGGGTACAGGGG-TGGAGACGGAGGAGACCTGGATTGTCC : 634
Aovo-DRB*W9102 : GGCCTCT-GTGAGGAGGTGACATGGGAGGCGGGTACAGGGG-TGGAGACGGAGGAGACCTGGATTGTCC : 658
Aovo-DRB*W9001 : GGCCTCT-GTGAGGAGGTGACATGGGAGGCGGGTGCAGGGG-TGGAGAGGGAGGAGACCTGGATTGTCC : 637
Aovo-DRB*W4501 : G----- : 610
Aovo-DRB*W9301 : G----- : 545

```

```

          1320          *          1340          *          1360          *
Aona-DRB1*0328GB : TTGGTCCTTAGAGATGCAGGAA-GGGAAATGTGAAGTGTGTGTGGCTGGGGTGAGGGTTTA : 1212
Aona-DRB1*0329GA : TTGGTCCTTAGAGATGCAGGAA-GGGAAATGTGAAGTGTGTGTGGCTGGGGTGAGGGTTTA : 1345
Aona-DRB1*031701GA : TTGGTCCTTAGAGATGCAGGAA-GGGAAATGTGAAGTGTGTGTGGCTGGGGTGAGGGTTTA : 1349
Aovo-DRB1*0304GA : TTGGTCCTTAGAGATGCAGGAA-GGGAAATGTGAAGTGTGTGTGGCTGGGGTGAGGGTTTA : 1001
Aovo-DRB1*0305GA : TTGGTCCTTAGAGATGCAGGAA-GGGAAATGTGAAGTGTGTGTGGCTGGGGTGAGGGTTTA : 1091
Aovo-DRB1*0306GA : TTGGTCCTTAGAGATGCAGGAA-GGGAAATGTGAAGTGTGTGTGGCTGGGGTGAGGGTTTA : 1015
Aovo-DRB1*0307GA : TTGGTCCTTAGAGATGCAGGAA-GGGAAATGTGAAGTGTGTGTGGCTGGGGTGAGGGTTTA : 1019
Aona-DRB3*0615 : TTGGTCCTTAGAGATGCAGGAA-GGGAAATGTGAAGTGTGTGTGGCTGGGGTGAGGGTTTA : 1047
Aona-DRB3*0627 : TTGGTCCTTAGAGATGCAGGAA-GGGAAATGTGAAGTGTGTGTGGCTGGGGTGAGGGTTTA : 1107
Aona-DRB3*062501 : TTGGTCCTTAGAGATGCAGGAA-GGGAAATGTGAAGTGTGTGTGGCTGGGGTGAGGGTTTA : 1047
Aona-DRB3*0626 : TTGGTCCTTAGAGATGCAGGAA-GGGAAATGTGAAGTGTGTGTGGCTGGGGTGAGGGTTTA : 1045
Aona-DRB3*062502 : TTGGTCCTTAGAGATGCAGGAA-GGGAAATGTGAAGTGTGTGTGGCTGGGGTGAGGGTTTA : 1025
Aona-DRB3*0628 : TTGGTCCTTAGAGATGCAGGAA-GGGAAATGTGAAGTGTGTGTGGCTGGGGTGAGGGTTTA : 1105
Aovo-DRB3*0601 : TTGGTCCTTAGAGATGCAGGAA-GGGAAATGTGAAGTGTGTGTGGCTGGGGTGAGGGTTTA : 1046
Aona-DRB*W8901 : TGGGTCCTTAGAGATGCAGGAAGGAAATG-TGAGGTGTGTGTGGCTGGGGTGAGGGTTTA : 755
Aona-DRB*W1808 : TGGGTCCTTAGAGATGCAGGAAGGAAATG-TGAAGTGTGTGTGGCTGGGGTGAGGGTTTA : 843
Aona-DRB*W1806 : TGGGTCCTTAGAGATGCAGGAAGGAAATG-TGAGGTGTGTGTGGCTGGGGTGAGGGTTTA : 833
Aovo-DRB*W1801 : ----- : -
Aovo-DRB*W1802 : TGGGTCCTTAGAGATGCAGGAAGGAAATG-TGAGGTGTGTGTGGCTGGGGTGAGGGTTTA : 829
Aovo-DRB*W1803 : TTGGTCCTTAGAGATGCAGGAAGGAAATG-TGAAGTGTGTGTGGCTGGGGTGAGGGTTTA : 819
Aovo-DRB*W8801 : TGGGTCCTTAGAGATGCAGGAATGAAATG-TGAGGTGTGTGTGGCTGGGGTGAGGGTTTA : 800
Aovo-DRB*W2901 : TGGGTCCTTAGAGATGCAGGAAGGAAATG-TGAGGTGTGTGTGGCTGGGGTGAGGGTTTA : 756
Aona-DRB*W2908 : TGGGTCCTTAGAGATGCAGGAAGGAAATG-TGAGGTGTGTGTGGCTGGGGTGAGGGTTTA : 756
Aona-DRB*W2910 : TGGGTCCTTAGAGATGCAGGAAGGAAATG-TGAGGTGTGTGTGGCTGGGGTGAGGGTTTA : 756
Aovo-DRB*W3001 : ----- : -
Aona-DRB*W3002 : TTGGTCCTTAGAGATGCAGGAATGAAATG-TGAGGTGTGTGTGGCTGGGGTGAGGGTTTA : 753
Aovo-DRB*W9201 : ----- : -
Aovo-DRB*W9202 : ----- : -
Aona-DRB*W9101 : TGGGTCCTTAGAGATGCAGGAA-TGGAATGTGAGGTGTGTGTGGCTGGGGTGAGGGTTTA : 718
Aovo-DRB*W9101 : TGGGTCCTTAGAGATGCAGGAA-TGGAATGTGAGGTGTGTGTGGCTGGGGTGAGGGTTTA : 694
Aovo-DRB*W9102 : TGGGTCCTTAGAGATGCAGGAA-TGGAATGTGAGGTGTGTGTGGCTGGGGTGAGGGTTTA : 718
Aovo-DRB*W9001 : TGGGTCCTTAGAGATGCAGGAA-GGGAAATGTGAGGTGTGTGTGGCTGGGGTGAGGGTTTA : 697
Aovo-DRB*W4501 : ----- : -
Aovo-DRB*W9301 : ----- : -

```
